# Supplementary material
Source: publisher figshare collection journal article supplement (https://acs.figshare.com/ndownloader/files/5132029)
Supplement: Supplementary file 1 [file 5132029]

Title: 'Au-Tl Linear Chains as Lewis Acids Towards [Au(C6X5)2]- Metalloligands:
        The First Anionic Polymetallic Chains.'
Authors: Eduardo J. Fern�ndez, Antonio Laguna, Jos� Mar�a L�pez-de-Luzuriaga,
         Manuel Montiel, M. Elena Olmos and Javier P�rez
Journal: Organometallics


data_complex2 
 
 
_audit_creation_method            SHELXL-97
_chemical_name_systematic
;
 ?
;
_chemical_name_common             ?
_chemical_melting_point           ?
_chemical_formula_moiety          ?
_chemical_formula_sum
 'C52 H36 Au3 Cl30 N Tl2'
_chemical_formula_weight          2737.96
 
loop_
 _atom_type_symbol
 _atom_type_description
 _atom_type_scat_dispersion_real
 _atom_type_scat_dispersion_imag
 _atom_type_scat_source
 'C'  'C'   0.0033   0.0016
 'International Tables Vol C Tables 4.2.6.8 and 6.1.1.4'
 'H'  'H'   0.0000   0.0000
 'International Tables Vol C Tables 4.2.6.8 and 6.1.1.4'
 'Au'  'Au'  -2.0133   8.8022
 'International Tables Vol C Tables 4.2.6.8 and 6.1.1.4'
 'Tl'  'Tl'  -2.8358   9.6688
 'International Tables Vol C Tables 4.2.6.8 and 6.1.1.4'
 'Cl'  'Cl'   0.1484   0.1585
 'International Tables Vol C Tables 4.2.6.8 and 6.1.1.4'
 'N'  'N'   0.0061   0.0033
 'International Tables Vol C Tables 4.2.6.8 and 6.1.1.4'
 
_symmetry_cell_setting            'Triclinic'
_symmetry_space_group_name_H-M    'P-1'
 
loop_
 _symmetry_equiv_pos_as_xyz
 'x, y, z'
 '-x, -y, -z'
 
_cell_length_a                    15.0212(2)
_cell_length_b                    15.1626(2)
_cell_length_c                    17.7726(3)
_cell_angle_alpha                 73.664(1)
_cell_angle_beta                  72.235(1)
_cell_angle_gamma                 79.629(1)
_cell_volume                      3679.55(9)
_cell_formula_units_Z             2
_cell_measurement_temperature     173(2)
_cell_measurement_reflns_used     15876
_cell_measurement_theta_min       2.09
_cell_measurement_theta_max       27.88
 
_exptl_crystal_description        'prism'
_exptl_crystal_colour             'pale yellow'
_exptl_crystal_size_max           0.3
_exptl_crystal_size_mid           0.1
_exptl_crystal_size_min           0.08
_exptl_crystal_density_meas       ?
_exptl_crystal_density_diffrn     2.471
_exptl_crystal_density_method     'not measured'
_exptl_crystal_F_000              2528
_exptl_absorpt_coefficient_mu     11.451
_exptl_absorpt_correction_type    'multiscan'
_exptl_absorpt_correction_T_min   ?
_exptl_absorpt_correction_T_max   ?
_exptl_absorpt_process_details    'scalepack'
 
_exptl_special_details
;
 'multi-scan from symmetry-related measurements'
;
 
_diffrn_ambient_temperature       173(2)
_diffrn_radiation_wavelength      0.71073
_diffrn_radiation_type            MoK\a
_diffrn_radiation_source          'fine-focus sealed tube'
_diffrn_radiation_monochromator   graphite
_diffrn_measurement_device_type   'Nonius KappaCCD'
_diffrn_measurement_method        '\w- and \f-scans'
_diffrn_detector_area_resol_mean  9
_diffrn_standards_number          ?
_diffrn_standards_interval_count  ?
_diffrn_standards_interval_time   ?
_diffrn_standards_decay_%         ?
_diffrn_reflns_number             53187
_diffrn_reflns_av_R_equivalents   0.0572
_diffrn_reflns_av_sigmaI/netI     0.0567
_diffrn_reflns_limit_h_min        -19
_diffrn_reflns_limit_h_max        19
_diffrn_reflns_limit_k_min        -19
_diffrn_reflns_limit_k_max        19
_diffrn_reflns_limit_l_min        -23
_diffrn_reflns_limit_l_max        23
_diffrn_reflns_theta_min          0.21
_diffrn_reflns_theta_max          27.91
_reflns_number_total              17410
_reflns_number_gt                 12836
_reflns_threshold_expression      >2sigma(I)
 
_computing_data_collection        'Nonius Kappa CCD' 
_computing_cell_refinement        'HKL Scalepack (Otwinoswki & Minor 1997)'
_computing_data_reduction         'Denzo and Scalepack (Otwinoswki & Minor 1997)' 
_computing_structure_solution     'SHELXS-97 (Sheldrick, 1990)' 
_computing_structure_refinement   'SHELXL-97 (Sheldrick, 1997)' 
_computing_molecular_graphics     'ORTEP III for Windows'
_computing_publication_material   'SHELXL-97'
 
_refine_special_details
;
 Refinement of F^2^ against ALL reflections.  The weighted R-factor wR and
 goodness of fit S are based on F^2^, conventional R-factors R are based
 on F, with F set to zero for negative F^2^. The threshold expression of
 F^2^ > 2sigma(F^2^) is used only for calculating R-factors(gt) etc. and is
 not relevant to the choice of reflections for refinement.  R-factors based
 on F^2^ are statistically about twice as large as those based on F, and R-
 factors based on ALL data will be even larger.
;
 
_refine_ls_structure_factor_coef  Fsqd
_refine_ls_matrix_type            full
_refine_ls_weighting_scheme       calc
_refine_ls_weighting_details
 'calc w=1/[\s^2^(Fo^2^)+(0.0329P)^2^+26.4032P] where P=(Fo^2^+2Fc^2^)/3'
_atom_sites_solution_primary      direct
_atom_sites_solution_secondary    difmap
_atom_sites_solution_hydrogens    geom
_refine_ls_hydrogen_treatment     mixed
_refine_ls_extinction_method      none
_refine_ls_extinction_coef        ?
_refine_ls_number_reflns          17410
_refine_ls_number_parameters      800
_refine_ls_number_restraints      226
_refine_ls_R_factor_all           0.0737
_refine_ls_R_factor_gt            0.0422
_refine_ls_wR_factor_ref          0.0925
_refine_ls_wR_factor_gt           0.0818
_refine_ls_goodness_of_fit_ref    1.016
_refine_ls_restrained_S_all       1.012
_refine_ls_shift/su_max           0.001
_refine_ls_shift/su_mean          0.000
 
loop_
 _atom_site_label
 _atom_site_type_symbol
 _atom_site_fract_x
 _atom_site_fract_y
 _atom_site_fract_z
 _atom_site_U_iso_or_equiv
 _atom_site_adp_type
 _atom_site_occupancy
 _atom_site_symmetry_multiplicity
 _atom_site_calc_flag
 _atom_site_refinement_flags
 _atom_site_disorder_assembly
 _atom_site_disorder_group
Au1 Au 1.0000 0.0000 -0.5000 0.02852(10) Uani 1 2 d S . .
Au2 Au 0.592586(19) -0.07594(2) -0.332138(18) 0.02341(7) Uani 1 1 d . . .
Au3 Au 0.5000 0.0000 0.0000 0.02331(9) Uani 1 2 d S . .
Au4 Au 0.807296(19) -0.06798(2) -0.207844(18) 0.02400(7) Uani 1 1 d . . .
Tl1 Tl 0.80513(2) -0.04992(2) -0.384531(19) 0.02834(7) Uani 1 1 d . . .
Tl2 Tl 0.59593(2) -0.01196(2) -0.178091(19) 0.02864(7) Uani 1 1 d . . .
C1 C 0.9515(4) 0.1377(6) -0.5076(4) 0.0295(17) Uani 1 1 d DU . .
C2 C 0.8736(5) 0.1790(5) -0.5349(4) 0.0294(17) Uani 1 1 d DU . .
C3 C 0.8444(5) 0.2731(5) -0.5466(4) 0.0308(17) Uani 1 1 d DU . .
C4 C 0.8968(5) 0.3304(6) -0.5328(5) 0.0332(18) Uani 1 1 d DU . .
C5 C 0.9759(5) 0.2919(5) -0.5052(5) 0.0330(18) Uani 1 1 d DU . .
C6 C 0.9978(5) 0.1973(5) -0.4891(5) 0.0295(17) Uani 1 1 d DU . .
Cl1 Cl 0.81205(15) 0.11125(16) -0.56235(16) 0.0480(6) Uani 1 1 d D . .
Cl2 Cl 0.73997(16) 0.31834(18) -0.57248(16) 0.0515(6) Uani 1 1 d D . .
Cl3 Cl 0.86545(18) 0.44831(17) -0.55155(16) 0.0502(6) Uani 1 1 d D . .
Cl4 Cl 1.04259(17) 0.36404(19) -0.49017(17) 0.0550(7) Uani 1 1 d D . .
Cl5 Cl 1.09314(14) 0.15014(17) -0.44887(14) 0.0421(5) Uani 1 1 d D . .
C11 C 0.5764(4) 0.0434(5) -0.4191(4) 0.0264(16) Uani 1 1 d DU . .
C12 C 0.5312(4) 0.1293(5) -0.4075(4) 0.0268(16) Uani 1 1 d DU . .
C13 C 0.5176(5) 0.2042(5) -0.4704(5) 0.0321(17) Uani 1 1 d DU . .
C14 C 0.5482(5) 0.1945(5) -0.5503(5) 0.0320(17) Uani 1 1 d DU . .
C15 C 0.5926(5) 0.1103(5) -0.5660(4) 0.0276(16) Uani 1 1 d DU . .
C16 C 0.6058(5) 0.0383(5) -0.5009(5) 0.0283(16) Uani 1 1 d DU . .
Cl6 Cl 0.48492(14) 0.14200(15) -0.30812(13) 0.0373(5) Uani 1 1 d D . .
Cl7 Cl 0.4673(2) 0.31026(16) -0.45297(16) 0.0541(6) Uani 1 1 d D . .
Cl8 Cl 0.53032(17) 0.28592(16) -0.62933(14) 0.0453(5) Uani 1 1 d D . .
Cl9 Cl 0.63350(15) 0.09868(17) -0.66476(13) 0.0403(5) Uani 1 1 d D . .
Cl10 Cl 0.66389(14) -0.06608(15) -0.52261(13) 0.0352(5) Uani 1 1 d D . .
C21 C 0.5928(4) -0.2074(5) -0.2589(4) 0.0247(15) Uani 1 1 d DU . .
C22 C 0.5186(4) -0.2332(5) -0.1903(4) 0.0249(15) Uani 1 1 d DU . .
C23 C 0.5048(5) -0.3242(5) -0.1488(4) 0.0264(16) Uani 1 1 d DU . .
C24 C 0.5677(5) -0.3947(5) -0.1770(4) 0.0285(16) Uani 1 1 d DU . .
C25 C 0.6442(5) -0.3737(5) -0.2441(4) 0.0271(16) Uani 1 1 d DU . .
C26 C 0.6556(5) -0.2814(5) -0.2829(4) 0.0260(16) Uani 1 1 d DU . .
Cl11 Cl 0.43587(13) -0.14750(14) -0.15497(12) 0.0313(4) Uani 1 1 d D . .
Cl12 Cl 0.41322(15) -0.35107(16) -0.06261(13) 0.0412(5) Uani 1 1 d D . .
Cl13 Cl 0.54989(16) -0.50850(15) -0.12866(15) 0.0443(5) Uani 1 1 d D . .
Cl14 Cl 0.72223(15) -0.46116(14) -0.27797(14) 0.0388(5) Uani 1 1 d D . .
Cl15 Cl 0.75084(13) -0.25834(14) -0.36858(13) 0.0337(4) Uani 1 1 d D . .
C31 C 0.3820(5) -0.0601(5) 0.0139(4) 0.0249(15) Uani 1 1 d DU . .
C32 C 0.3188(5) -0.0207(5) -0.0314(4) 0.0324(18) Uani 1 1 d DU . .
C33 C 0.2448(6) -0.0670(6) -0.0300(5) 0.048(2) Uani 1 1 d DU . .
C34 C 0.2355(6) -0.1556(6) 0.0174(5) 0.047(2) Uani 1 1 d DU . .
C35 C 0.2953(6) -0.1969(6) 0.0647(5) 0.0371(19) Uani 1 1 d DU . .
C36 C 0.3669(5) -0.1481(5) 0.0626(5) 0.0300(17) Uani 1 1 d DU . .
Cl16 Cl 0.33456(16) 0.08802(16) -0.09834(14) 0.0452(5) Uani 1 1 d D . .
Cl17 Cl 0.1687(2) -0.0148(2) -0.0889(2) 0.0799(10) Uani 1 1 d D . .
Cl18 Cl 0.1495(2) -0.2165(3) 0.0160(2) 0.0857(11) Uani 1 1 d D . .
Cl19 Cl 0.28489(17) -0.30841(17) 0.12304(16) 0.0526(6) Uani 1 1 d D . .
Cl20 Cl 0.44038(16) -0.20273(15) 0.12526(14) 0.0406(5) Uani 1 1 d D . .
C41 C 0.8426(5) 0.0647(5) -0.2341(4) 0.0296(17) Uani 1 1 d DU . .
C42 C 0.8060(4) 0.1459(5) -0.2784(4) 0.0267(16) Uani 1 1 d DU . .
C43 C 0.8352(5) 0.2327(5) -0.2909(4) 0.0304(17) Uani 1 1 d DU . .
C44 C 0.9054(5) 0.2395(5) -0.2582(5) 0.0323(18) Uani 1 1 d DU . .
C45 C 0.9460(5) 0.1604(5) -0.2155(6) 0.037(2) Uani 1 1 d DU . .
C46 C 0.9128(6) 0.0753(5) -0.2022(6) 0.038(2) Uani 1 1 d DU . .
Cl21 Cl 0.72019(14) 0.14315(14) -0.32517(13) 0.0346(4) Uani 1 1 d D . .
Cl22 Cl 0.78181(16) 0.33187(14) -0.34147(14) 0.0410(5) Uani 1 1 d D . .
Cl23 Cl 0.94025(16) 0.34620(15) -0.26889(17) 0.0492(6) Uani 1 1 d D . .
Cl24 Cl 1.0376(2) 0.16652(19) -0.1771(2) 0.0722(9) Uani 1 1 d D . .
Cl25 Cl 0.9624(2) -0.02106(17) -0.1437(2) 0.0680(9) Uani 1 1 d D . .
C51 C 0.7978(4) -0.2091(5) -0.1768(4) 0.0232(15) Uani 1 1 d DU . .
C52 C 0.7327(5) -0.2578(5) -0.1118(4) 0.0257(15) Uani 1 1 d DU . .
C53 C 0.7376(5) -0.3537(5) -0.0885(4) 0.0263(16) Uani 1 1 d DU . .
C54 C 0.8118(5) -0.4052(5) -0.1307(4) 0.0270(16) Uani 1 1 d DU . .
C55 C 0.8782(5) -0.3602(5) -0.1968(4) 0.0248(15) Uani 1 1 d DU . .
C56 C 0.8698(5) -0.2640(5) -0.2185(4) 0.0230(15) Uani 1 1 d DU . .
Cl26 Cl 0.64210(14) -0.19762(14) -0.05215(12) 0.0349(5) Uani 1 1 d D . .
Cl27 Cl 0.65119(14) -0.40932(14) -0.00951(13) 0.0359(5) Uani 1 1 d D . .
Cl28 Cl 0.82246(16) -0.52429(14) -0.10000(15) 0.0435(5) Uani 1 1 d D . .
Cl29 Cl 0.96866(15) -0.42389(15) -0.25248(15) 0.0428(5) Uani 1 1 d D . .
Cl30 Cl 0.95584(13) -0.21133(14) -0.30144(13) 0.0356(5) Uani 1 1 d D . .
N N 0.7430(5) 0.5610(5) 0.2090(4) 0.0410(16) Uani 1 1 d U . .
C61 C 0.7688(7) 0.4568(6) 0.2186(6) 0.048(2) Uani 1 1 d U . .
H61A H 0.8364 0.4429 0.2163 0.058 Uiso 1 1 calc R . .
H61B H 0.7333 0.4250 0.2735 0.058 Uiso 1 1 calc R . .
C62 C 0.7507(8) 0.4156(7) 0.1569(7) 0.062(3) Uani 1 1 d U . .
H62A H 0.7963 0.4357 0.1034 0.074 Uiso 1 1 calc R . .
H62B H 0.6868 0.4388 0.1506 0.074 Uiso 1 1 calc R . .
C63 C 0.7595(8) 0.3105(8) 0.1830(8) 0.067(3) Uani 1 1 d U . .
H63A H 0.7118 0.2912 0.2353 0.080 Uiso 1 1 calc R . .
H63B H 0.7450 0.2867 0.1420 0.080 Uiso 1 1 calc R . .
C64 C 0.8530(8) 0.2669(9) 0.1927(9) 0.082(4) Uani 1 1 d U . .
H64A H 0.9008 0.2841 0.1409 0.123 Uiso 1 1 calc R . .
H64B H 0.8527 0.1996 0.2093 0.123 Uiso 1 1 calc R . .
H64C H 0.8674 0.2882 0.2345 0.123 Uiso 1 1 calc R . .
C65 C 0.7911(6) 0.6147(6) 0.1249(6) 0.041(2) Uani 1 1 d U . .
H65A H 0.7695 0.6811 0.1205 0.049 Uiso 1 1 calc R . .
H65B H 0.7706 0.5955 0.0844 0.049 Uiso 1 1 calc R . .
C66 C 0.8986(6) 0.6029(7) 0.1022(6) 0.048(2) Uani 1 1 d U . .
H66A H 0.9206 0.6302 0.1370 0.058 Uiso 1 1 calc R . .
H66B H 0.9214 0.5363 0.1121 0.058 Uiso 1 1 calc R . .
C67 C 0.9391(7) 0.6500(7) 0.0127(6) 0.051(2) Uani 1 1 d U . .
H67A H 1.0084 0.6367 -0.0014 0.061 Uiso 1 1 calc R . .
H67B H 0.9158 0.6230 -0.0214 0.061 Uiso 1 1 calc R . .
C68 C 0.9142(8) 0.7546(8) -0.0081(7) 0.062(3) Uani 1 1 d U . .
H68A H 0.8458 0.7686 0.0063 0.094 Uiso 1 1 calc R . .
H68B H 0.9402 0.7796 -0.0666 0.094 Uiso 1 1 calc R . .
H68C H 0.9408 0.7826 0.0225 0.094 Uiso 1 1 calc R . .
C69 C 0.7755(6) 0.5846(7) 0.2733(6) 0.048(2) Uani 1 1 d U . .
H69A H 0.7466 0.5448 0.3270 0.058 Uiso 1 1 calc R . .
H69B H 0.8445 0.5690 0.2620 0.058 Uiso 1 1 calc R . .
C70 C 0.7530(7) 0.6836(9) 0.2789(7) 0.061(3) Uani 1 1 d U . .
H70A H 0.6849 0.7023 0.2861 0.074 Uiso 1 1 calc R . .
H70B H 0.7878 0.7243 0.2283 0.074 Uiso 1 1 calc R . .
C71 C 0.7812(8) 0.6922(12) 0.3507(10) 0.108(6) Uani 1 1 d U . .
H71A H 0.7500 0.6473 0.4000 0.130 Uiso 1 1 calc R . .
H71B H 0.8500 0.6761 0.3413 0.130 Uiso 1 1 calc R . .
C72 C 0.7566(10) 0.7853(13) 0.3652(13) 0.141(9) Uani 1 1 d U . .
H72A H 0.7840 0.8306 0.3154 0.212 Uiso 1 1 calc R . .
H72B H 0.7814 0.7885 0.4093 0.212 Uiso 1 1 calc R . .
H72C H 0.6881 0.7990 0.3805 0.212 Uiso 1 1 calc R . .
C73 C 0.6378(6) 0.5862(6) 0.2212(6) 0.041(2) Uani 1 1 d U . .
H73A H 0.6197 0.5707 0.1777 0.049 Uiso 1 1 calc R . .
H73B H 0.6242 0.6539 0.2146 0.049 Uiso 1 1 calc R . .
C74 C 0.5765(6) 0.5389(7) 0.3031(6) 0.049(2) Uani 1 1 d U . .
H74A H 0.5800 0.4722 0.3059 0.058 Uiso 1 1 calc R . .
H74B H 0.6010 0.5447 0.3471 0.058 Uiso 1 1 calc R . .
C75 C 0.4755(6) 0.5796(7) 0.3168(6) 0.046(2) Uani 1 1 d U . .
H75A H 0.4514 0.5750 0.2722 0.055 Uiso 1 1 calc R . .
H75B H 0.4718 0.6460 0.3153 0.055 Uiso 1 1 calc R . .
C76 C 0.4139(6) 0.5310(8) 0.3978(6) 0.051(3) Uani 1 1 d U . .
H76A H 0.4118 0.4670 0.3974 0.077 Uiso 1 1 calc R . .
H76B H 0.3501 0.5630 0.4065 0.077 Uiso 1 1 calc R . .
H76C H 0.4399 0.5318 0.4419 0.077 Uiso 1 1 calc R . .
 
loop_
 _atom_site_aniso_label
 _atom_site_aniso_U_11
 _atom_site_aniso_U_22
 _atom_site_aniso_U_33
 _atom_site_aniso_U_23
 _atom_site_aniso_U_13
 _atom_site_aniso_U_12
Au1 0.0204(2) 0.0386(3) 0.0242(2) 0.00073(19) -0.00686(17) -0.00897(17)
Au2 0.02288(14) 0.02519(15) 0.02138(15) -0.00407(12) -0.00539(11) -0.00400(11)
Au3 0.0252(2) 0.0249(2) 0.0196(2) -0.00586(17) -0.00491(16) -0.00350(16)
Au4 0.02614(15) 0.02066(15) 0.02451(16) -0.00261(12) -0.00774(12) -0.00363(11)
Tl1 0.02576(15) 0.03120(17) 0.02572(16) -0.00459(13) -0.00393(12) -0.00601(12)
Tl2 0.02928(15) 0.03262(17) 0.02328(16) -0.00678(13) -0.00624(12) -0.00284(12)
C1 0.024(4) 0.037(4) 0.020(4) 0.002(3) -0.003(3) -0.006(3)
C2 0.026(4) 0.037(4) 0.024(4) 0.004(4) -0.012(3) -0.012(3)
C3 0.023(4) 0.038(4) 0.022(4) 0.008(4) -0.005(3) -0.008(3)
C4 0.029(4) 0.038(4) 0.023(4) -0.001(4) 0.000(3) -0.002(3)
C5 0.029(4) 0.044(4) 0.027(5) -0.013(4) -0.002(3) -0.009(3)
C6 0.023(4) 0.045(4) 0.020(4) -0.006(4) -0.007(3) -0.004(3)
Cl1 0.0418(12) 0.0469(13) 0.0597(16) 0.0115(12) -0.0324(11) -0.0220(10)
Cl2 0.0390(12) 0.0558(15) 0.0538(16) 0.0093(12) -0.0254(11) -0.0037(11)
Cl3 0.0586(15) 0.0415(13) 0.0472(15) -0.0090(11) -0.0135(12) -0.0007(11)
Cl4 0.0523(14) 0.0603(16) 0.0673(18) -0.0336(14) -0.0178(13) -0.0112(12)
Cl5 0.0316(11) 0.0590(15) 0.0457(14) -0.0187(12) -0.0213(10) -0.0009(10)
C11 0.027(4) 0.027(4) 0.029(4) -0.003(3) -0.015(3) -0.007(3)
C12 0.029(4) 0.031(4) 0.023(4) -0.006(3) -0.010(3) -0.005(3)
C13 0.037(4) 0.030(4) 0.030(4) -0.004(3) -0.012(4) -0.008(3)
C14 0.033(4) 0.033(4) 0.031(4) 0.004(4) -0.020(4) -0.008(3)
C15 0.029(4) 0.040(4) 0.016(4) 0.001(3) -0.009(3) -0.014(3)
C16 0.029(4) 0.028(4) 0.029(4) -0.007(3) -0.006(3) -0.010(3)
Cl6 0.0384(11) 0.0422(12) 0.0291(11) -0.0107(9) -0.0113(9) 0.0086(9)
Cl7 0.0805(18) 0.0334(12) 0.0478(15) -0.0107(11) -0.0260(13) 0.0122(12)
Cl8 0.0579(14) 0.0407(13) 0.0361(13) 0.0066(10) -0.0237(11) -0.0080(10)
Cl9 0.0435(12) 0.0558(14) 0.0230(11) -0.0076(10) -0.0095(9) -0.0105(10)
Cl10 0.0349(10) 0.0384(11) 0.0344(12) -0.0148(10) -0.0082(9) -0.0019(9)
C21 0.023(4) 0.027(4) 0.027(4) -0.008(3) -0.010(3) -0.002(3)
C22 0.028(4) 0.027(4) 0.023(4) -0.009(3) -0.009(3) -0.002(3)
C23 0.030(4) 0.031(4) 0.018(4) -0.005(3) -0.004(3) -0.007(3)
C24 0.036(4) 0.027(4) 0.024(4) -0.001(3) -0.013(3) -0.008(3)
C25 0.026(4) 0.032(4) 0.025(4) -0.008(3) -0.008(3) -0.003(3)
C26 0.029(4) 0.032(4) 0.014(4) -0.003(3) -0.003(3) -0.006(3)
Cl11 0.0304(10) 0.0331(11) 0.0279(11) -0.0108(9) -0.0019(8) -0.0019(8)
Cl12 0.0400(12) 0.0432(13) 0.0316(12) -0.0037(10) 0.0037(9) -0.0139(9)
Cl13 0.0542(13) 0.0286(11) 0.0446(14) -0.0017(10) -0.0074(11) -0.0124(10)
Cl14 0.0413(11) 0.0277(10) 0.0450(13) -0.0123(10) -0.0076(10) 0.0012(9)
Cl15 0.0321(10) 0.0336(11) 0.0310(11) -0.0099(9) 0.0011(8) -0.0058(8)
C31 0.019(3) 0.033(4) 0.021(4) -0.012(3) 0.000(3) -0.001(3)
C32 0.026(4) 0.045(5) 0.029(5) -0.015(4) -0.011(3) 0.003(3)
C33 0.038(5) 0.062(6) 0.054(6) -0.027(5) -0.023(5) 0.005(4)
C34 0.033(5) 0.057(5) 0.059(7) -0.029(5) -0.007(4) -0.014(4)
C35 0.039(5) 0.037(5) 0.032(5) -0.013(4) 0.005(4) -0.015(4)
C36 0.025(4) 0.033(4) 0.028(4) -0.009(3) 0.002(3) -0.005(3)
Cl16 0.0509(13) 0.0435(13) 0.0411(13) -0.0037(11) -0.0231(11) 0.0039(10)
Cl17 0.0572(17) 0.104(3) 0.096(3) -0.020(2) -0.0523(17) -0.0030(16)
Cl18 0.0629(18) 0.109(3) 0.104(3) -0.030(2) -0.0241(18) -0.0463(18)
Cl19 0.0606(15) 0.0418(13) 0.0488(15) -0.0175(12) 0.0133(12) -0.0270(11)
Cl20 0.0497(13) 0.0325(11) 0.0344(12) 0.0002(9) -0.0104(10) -0.0058(9)
C41 0.031(4) 0.018(3) 0.037(5) -0.001(3) -0.011(3) 0.000(3)
C42 0.026(4) 0.027(4) 0.030(4) -0.011(3) -0.011(3) 0.004(3)
C43 0.034(4) 0.022(4) 0.031(5) -0.005(3) -0.007(3) 0.003(3)
C44 0.036(4) 0.023(4) 0.036(5) -0.009(3) -0.001(3) -0.008(3)
C45 0.035(4) 0.026(4) 0.058(6) -0.012(4) -0.019(4) -0.006(3)
C46 0.045(5) 0.017(4) 0.056(6) 0.002(4) -0.028(4) -0.004(3)
Cl21 0.0366(11) 0.0331(11) 0.0341(12) -0.0038(9) -0.0147(9) -0.0013(8)
Cl22 0.0555(13) 0.0216(10) 0.0366(12) -0.0018(9) -0.0080(10) 0.0032(9)
Cl23 0.0498(13) 0.0269(11) 0.0695(17) -0.0133(11) -0.0070(12) -0.0141(10)
Cl24 0.0703(18) 0.0484(15) 0.122(3) -0.0138(17) -0.0610(19) -0.0152(13)
Cl25 0.0795(19) 0.0361(13) 0.107(2) 0.0072(14) -0.0727(19) -0.0088(12)
C51 0.028(4) 0.017(3) 0.024(4) 0.000(3) -0.013(3) 0.000(3)
C52 0.030(4) 0.030(4) 0.019(4) -0.009(3) -0.009(3) 0.000(3)
C53 0.027(4) 0.027(4) 0.027(4) -0.005(3) -0.007(3) -0.010(3)
C54 0.039(4) 0.019(4) 0.026(4) -0.003(3) -0.014(3) -0.007(3)
C55 0.028(4) 0.027(4) 0.019(4) -0.007(3) -0.003(3) -0.002(3)
C56 0.027(4) 0.025(4) 0.017(4) 0.001(3) -0.009(3) -0.006(3)
Cl26 0.0380(11) 0.0349(11) 0.0238(10) -0.0061(9) 0.0009(8) -0.0017(9)
Cl27 0.0386(11) 0.0358(11) 0.0284(11) 0.0043(9) -0.0056(9) -0.0166(9)
Cl28 0.0587(14) 0.0198(10) 0.0489(14) -0.0034(10) -0.0125(11) -0.0078(9)
Cl29 0.0421(12) 0.0326(11) 0.0484(14) -0.0155(10) -0.0041(10) 0.0045(9)
Cl30 0.0263(10) 0.0358(11) 0.0328(11) 0.0000(9) 0.0020(8) -0.0036(8)
N 0.042(4) 0.050(4) 0.030(4) -0.003(3) -0.014(3) -0.005(3)
C61 0.046(5) 0.043(4) 0.042(6) 0.001(4) -0.008(4) 0.005(4)
C62 0.072(7) 0.049(5) 0.066(8) -0.015(5) -0.028(6) 0.007(5)
C63 0.070(7) 0.050(6) 0.076(9) -0.011(6) -0.020(6) -0.004(5)
C64 0.073(7) 0.064(8) 0.088(10) -0.008(7) -0.012(7) 0.015(6)
C65 0.041(4) 0.043(5) 0.039(5) -0.004(4) -0.014(4) -0.007(4)
C66 0.045(5) 0.049(6) 0.047(5) -0.006(4) -0.009(4) -0.007(4)
C67 0.046(5) 0.065(6) 0.038(5) -0.007(5) -0.007(4) -0.011(5)
C68 0.061(7) 0.063(6) 0.059(7) 0.004(5) -0.021(6) -0.016(5)
C69 0.035(5) 0.077(6) 0.035(5) -0.018(5) -0.013(4) 0.002(5)
C70 0.035(5) 0.098(8) 0.067(7) -0.044(7) -0.017(5) -0.007(5)
C71 0.041(6) 0.190(15) 0.151(14) -0.137(13) -0.053(8) 0.046(8)
C72 0.067(9) 0.191(17) 0.24(2) -0.170(18) -0.064(12) 0.022(10)
C73 0.033(4) 0.043(5) 0.049(5) -0.006(4) -0.018(3) -0.006(4)
C74 0.040(4) 0.050(6) 0.047(6) -0.002(5) -0.010(4) -0.001(4)
C75 0.043(5) 0.054(6) 0.043(5) -0.012(5) -0.017(4) -0.001(4)
C76 0.038(5) 0.070(7) 0.043(6) -0.010(5) -0.013(4) -0.002(5)
 
_geom_special_details
;
 All esds (except the esd in the dihedral angle between two l.s. planes)
 are estimated using the full covariance matrix.  The cell esds are taken
 into account individually in the estimation of esds in distances, angles
 and torsion angles; correlations between esds in cell parameters are only
 used when they are defined by crystal symmetry.  An approximate (isotropic)
 treatment of cell esds is used for estimating esds involving l.s. planes.
;
 
loop_
 _geom_bond_atom_site_label_1
 _geom_bond_atom_site_label_2
 _geom_bond_distance
 _geom_bond_site_symmetry_2
 _geom_bond_publ_flag
Au1 C1 2.064(8) . ?
Au1 C1 2.064(8) 2_754 ?
Au1 Tl1 3.1001(3) 2_754 ?
Au1 Tl1 3.1001(3) . ?
Au2 C21 2.051(8) . ?
Au2 C11 2.055(8) . ?
Au2 Tl1 3.1062(4) . ?
Au2 Tl2 3.1678(4) . ?
Au3 C31 2.054(7) 2_655 ?
Au3 C31 2.054(7) . ?
Au3 Tl2 3.0940(3) . ?
Au3 Tl2 3.0940(3) 2_655 ?
Au4 C41 2.062(7) . ?
Au4 C51 2.074(7) . ?
Au4 Tl2 3.0559(4) . ?
Au4 Tl1 3.0842(4) . ?
C1 C2 1.382(9) . ?
C1 C6 1.394(9) . ?
C2 C3 1.391(10) . ?
C2 Cl1 1.745(7) . ?
C3 C4 1.384(10) . ?
C3 Cl2 1.737(7) . ?
C4 C5 1.394(9) . ?
C4 Cl3 1.728(9) . ?
C5 C6 1.379(10) . ?
C5 Cl4 1.730(7) . ?
C6 Cl5 1.744(7) . ?
C11 C12 1.395(9) . ?
C11 C16 1.404(9) . ?
C12 C13 1.386(10) . ?
C12 Cl6 1.742(7) . ?
C13 C14 1.395(9) . ?
C13 Cl7 1.719(8) . ?
C14 C15 1.390(9) . ?
C14 Cl8 1.722(8) . ?
C15 C16 1.386(10) . ?
C15 Cl9 1.723(7) . ?
C16 Cl10 1.749(7) . ?
C21 C22 1.394(9) . ?
C21 C26 1.404(9) . ?
C22 C23 1.389(9) . ?
C22 Cl11 1.740(7) . ?
C23 C24 1.390(9) . ?
C23 Cl12 1.723(7) . ?
C24 C25 1.387(9) . ?
C24 Cl13 1.727(8) . ?
C25 C26 1.390(9) . ?
C25 Cl14 1.719(7) . ?
C26 Cl15 1.743(7) . ?
C31 C32 1.378(9) . ?
C31 C36 1.386(9) . ?
C32 C33 1.408(10) . ?
C32 Cl16 1.748(8) . ?
C33 C34 1.375(11) . ?
C33 Cl17 1.722(9) . ?
C34 C35 1.367(10) . ?
C34 Cl18 1.728(9) . ?
C35 C36 1.397(10) . ?
C35 Cl19 1.723(8) . ?
C36 Cl20 1.745(8) . ?
C41 C42 1.385(9) . ?
C41 C46 1.391(9) . ?
C42 C43 1.400(9) . ?
C42 Cl21 1.745(7) . ?
C43 C44 1.380(9) . ?
C43 Cl22 1.719(7) . ?
C44 C45 1.377(10) . ?
C44 Cl23 1.731(8) . ?
C45 C46 1.398(10) . ?
C45 Cl24 1.739(8) . ?
C46 Cl25 1.732(8) . ?
C51 C52 1.387(9) . ?
C51 C56 1.394(9) . ?
C52 C53 1.390(9) . ?
C52 Cl26 1.739(7) . ?
C53 C54 1.386(9) . ?
C53 Cl27 1.727(7) . ?
C54 C55 1.385(9) . ?
C54 Cl28 1.726(8) . ?
C55 C56 1.393(9) . ?
C55 Cl29 1.733(7) . ?
C56 Cl30 1.740(7) . ?
N C65 1.513(11) . ?
N C69 1.518(11) . ?
N C73 1.521(11) . ?
N C61 1.530(12) . ?
C61 C62 1.515(14) . ?
C62 C63 1.523(14) . ?
C63 C64 1.479(15) . ?
C65 C66 1.530(12) . ?
C66 C67 1.529(13) . ?
C67 C68 1.527(14) . ?
C69 C70 1.502(14) . ?
C70 C71 1.507(15) . ?
C71 C72 1.468(19) . ?
C73 C74 1.521(13) . ?
C74 C75 1.506(12) . ?
C75 C76 1.519(13) . ?
 
loop_
 _geom_angle_atom_site_label_1
 _geom_angle_atom_site_label_2
 _geom_angle_atom_site_label_3
 _geom_angle
 _geom_angle_site_symmetry_1
 _geom_angle_site_symmetry_3
 _geom_angle_publ_flag
C1 Au1 C1 180.000(1) . 2_754 ?
C1 Au1 Tl1 91.53(18) . 2_754 ?
C1 Au1 Tl1 88.47(18) 2_754 2_754 ?
C1 Au1 Tl1 88.47(18) . . ?
C1 Au1 Tl1 91.53(18) 2_754 . ?
Tl1 Au1 Tl1 180.000(7) 2_754 . ?
C21 Au2 C11 166.7(2) . . ?
C21 Au2 Tl1 100.84(17) . . ?
C11 Au2 Tl1 87.14(18) . . ?
C21 Au2 Tl2 85.98(18) . . ?
C11 Au2 Tl2 105.77(18) . . ?
Tl1 Au2 Tl2 82.658(10) . . ?
C31 Au3 C31 180.0(4) 2_655 . ?
C31 Au3 Tl2 83.41(18) 2_655 . ?
C31 Au3 Tl2 96.59(18) . . ?
C31 Au3 Tl2 96.59(18) 2_655 2_655 ?
C31 Au3 Tl2 83.41(18) . 2_655 ?
Tl2 Au3 Tl2 180.000(14) . 2_655 ?
C41 Au4 C51 168.6(2) . . ?
C41 Au4 Tl2 95.16(18) . . ?
C51 Au4 Tl2 95.56(17) . . ?
C41 Au4 Tl1 92.7(2) . . ?
C51 Au4 Tl1 92.19(18) . . ?
Tl2 Au4 Tl1 84.881(11) . . ?
Au4 Tl1 Au1 108.827(10) . . ?
Au4 Tl1 Au2 92.312(11) . . ?
Au1 Tl1 Au2 158.203(13) . . ?
Au4 Tl2 Au3 112.141(11) . . ?
Au4 Tl2 Au2 91.659(11) . . ?
Au3 Tl2 Au2 148.614(12) . . ?
C2 C1 C6 114.7(7) . . ?
C2 C1 Au1 123.0(5) . . ?
C6 C1 Au1 122.3(5) . . ?
C1 C2 C3 123.7(7) . . ?
C1 C2 Cl1 118.5(6) . . ?
C3 C2 Cl1 117.7(5) . . ?
C4 C3 C2 119.3(7) . . ?
C4 C3 Cl2 119.7(6) . . ?
C2 C3 Cl2 120.9(6) . . ?
C3 C4 C5 119.0(8) . . ?
C3 C4 Cl3 120.3(6) . . ?
C5 C4 Cl3 120.6(6) . . ?
C6 C5 C4 119.2(7) . . ?
C6 C5 Cl4 121.9(6) . . ?
C4 C5 Cl4 118.9(6) . . ?
C5 C6 C1 123.6(7) . . ?
C5 C6 Cl5 118.3(6) . . ?
C1 C6 Cl5 118.0(6) . . ?
C12 C11 C16 113.9(7) . . ?
C12 C11 Au2 128.1(5) . . ?
C16 C11 Au2 117.6(5) . . ?
C13 C12 C11 123.8(7) . . ?
C13 C12 Cl6 118.0(6) . . ?
C11 C12 Cl6 118.2(6) . . ?
C12 C13 C14 119.5(7) . . ?
C12 C13 Cl7 121.7(6) . . ?
C14 C13 Cl7 118.8(6) . . ?
C15 C14 C13 119.7(7) . . ?
C15 C14 Cl8 120.0(6) . . ?
C13 C14 Cl8 120.3(6) . . ?
C16 C15 C14 118.4(7) . . ?
C16 C15 Cl9 121.6(6) . . ?
C14 C15 Cl9 119.9(6) . . ?
C15 C16 C11 124.8(7) . . ?
C15 C16 Cl10 117.4(6) . . ?
C11 C16 Cl10 117.9(6) . . ?
C22 C21 C26 114.6(7) . . ?
C22 C21 Au2 121.5(5) . . ?
C26 C21 Au2 122.5(5) . . ?
C23 C22 C21 123.9(6) . . ?
C23 C22 Cl11 117.2(5) . . ?
C21 C22 Cl11 118.8(6) . . ?
C22 C23 C24 118.8(6) . . ?
C22 C23 Cl12 121.4(5) . . ?
C24 C23 Cl12 119.8(6) . . ?
C25 C24 C23 120.2(7) . . ?
C25 C24 Cl13 120.1(5) . . ?
C23 C24 Cl13 119.7(5) . . ?
C24 C25 C26 118.8(6) . . ?
C24 C25 Cl14 119.9(6) . . ?
C26 C25 Cl14 121.4(5) . . ?
C25 C26 C21 123.7(6) . . ?
C25 C26 Cl15 117.2(5) . . ?
C21 C26 Cl15 119.1(6) . . ?
C32 C31 C36 115.5(7) . . ?
C32 C31 Au3 122.4(5) . . ?
C36 C31 Au3 121.7(5) . . ?
C31 C32 C33 122.6(7) . . ?
C31 C32 Cl16 119.2(6) . . ?
C33 C32 Cl16 118.1(6) . . ?
C34 C33 C32 119.1(8) . . ?
C34 C33 Cl17 120.3(7) . . ?
C32 C33 Cl17 120.6(7) . . ?
C35 C34 C33 120.4(8) . . ?
C35 C34 Cl18 119.4(6) . . ?
C33 C34 Cl18 120.2(6) . . ?
C34 C35 C36 118.7(7) . . ?
C34 C35 Cl19 120.5(6) . . ?
C36 C35 Cl19 120.7(7) . . ?
C31 C36 C35 123.6(7) . . ?
C31 C36 Cl20 119.2(5) . . ?
C35 C36 Cl20 117.2(6) . . ?
C42 C41 C46 114.5(7) . . ?
C42 C41 Au4 129.5(5) . . ?
C46 C41 Au4 116.0(5) . . ?
C41 C42 C43 124.0(7) . . ?
C41 C42 Cl21 119.9(6) . . ?
C43 C42 Cl21 116.1(5) . . ?
C44 C43 C42 119.2(7) . . ?
C44 C43 Cl22 119.1(6) . . ?
C42 C43 Cl22 121.6(6) . . ?
C45 C44 C43 119.0(7) . . ?
C45 C44 Cl23 120.4(6) . . ?
C43 C44 Cl23 120.6(6) . . ?
C44 C45 C46 120.0(7) . . ?
C44 C45 Cl24 119.9(6) . . ?
C46 C45 Cl24 120.1(6) . . ?
C41 C46 C45 123.2(7) . . ?
C41 C46 Cl25 118.8(6) . . ?
C45 C46 Cl25 118.0(6) . . ?
C52 C51 C56 114.8(7) . . ?
C52 C51 Au4 126.9(5) . . ?
C56 C51 Au4 117.8(5) . . ?
C51 C52 C53 123.7(6) . . ?
C51 C52 Cl26 119.4(5) . . ?
C53 C52 Cl26 116.9(5) . . ?
C54 C53 C52 119.4(6) . . ?
C54 C53 Cl27 119.6(6) . . ?
C52 C53 Cl27 121.0(5) . . ?
C55 C54 C53 119.4(7) . . ?
C55 C54 Cl28 120.3(5) . . ?
C53 C54 Cl28 120.2(5) . . ?
C54 C55 C56 119.2(6) . . ?
C54 C55 Cl29 119.8(6) . . ?
C56 C55 Cl29 121.0(5) . . ?
C55 C56 C51 123.5(6) . . ?
C55 C56 Cl30 117.1(5) . . ?
C51 C56 Cl30 119.4(5) . . ?
C65 N C69 110.6(7) . . ?
C65 N C73 107.1(7) . . ?
C69 N C73 111.1(7) . . ?
C65 N C61 111.4(7) . . ?
C69 N C61 105.7(7) . . ?
C73 N C61 111.1(7) . . ?
C62 C61 N 116.7(8) . . ?
C61 C62 C63 111.4(9) . . ?
C64 C63 C62 114.7(10) . . ?
N C65 C66 115.4(7) . . ?
C67 C66 C65 110.6(8) . . ?
C68 C67 C66 114.0(9) . . ?
C70 C69 N 115.6(8) . . ?
C69 C70 C71 108.3(10) . . ?
C72 C71 C70 112.9(14) . . ?
N C73 C74 115.2(7) . . ?
C75 C74 C73 112.1(8) . . ?
C74 C75 C76 112.1(8) . . ?
 
_diffrn_measured_fraction_theta_max    0.989
_diffrn_reflns_theta_full              27.91
_diffrn_measured_fraction_theta_full   0.989
_refine_diff_density_max    1.984
_refine_diff_density_min   -2.116
_refine_diff_density_rms    0.220


 
END of data for 2#########################################

 
data_complex 3
 
 
 
_audit_creation_method            SHELXL-97 
_chemical_name_systematic 
; 
 ? 
; 
_chemical_name_common             ? 
_chemical_melting_point           ? 
_chemical_formula_moiety          ? 
_chemical_formula_sum 
 'C40 H36 Au2 Cl8 F12 N Tl' 
_chemical_formula_weight          1640.60 
 
loop_ 
 _atom_type_symbol 
 _atom_type_description 
 _atom_type_scat_dispersion_real 
 _atom_type_scat_dispersion_imag 
 _atom_type_scat_source 
 'C'  'C'   0.0033   0.0016 
 'International Tables Vol C Tables 4.2.6.8 and 6.1.1.4' 
 'H'  'H'   0.0000   0.0000 
 'International Tables Vol C Tables 4.2.6.8 and 6.1.1.4' 
 'Au'  'Au'  -2.0133   8.8022 
 'International Tables Vol C Tables 4.2.6.8 and 6.1.1.4' 
 'Cl'  'Cl'   0.1484   0.1585 
 'International Tables Vol C Tables 4.2.6.8 and 6.1.1.4' 
 'F'  'F'   0.0171   0.0103 
 'International Tables Vol C Tables 4.2.6.8 and 6.1.1.4' 
 'N'  'N'   0.0061   0.0033 
 'International Tables Vol C Tables 4.2.6.8 and 6.1.1.4' 
 'Tl'  'Tl'  -2.8358   9.6688 
 'International Tables Vol C Tables 4.2.6.8 and 6.1.1.4' 
 
_symmetry_cell_setting            'Monoclinic'
_symmetry_space_group_name_H-M    'P21/n'
 
loop_ 
 _symmetry_equiv_pos_as_xyz 
 'x, y, z' 
 '-x+1/2, y+1/2, -z+1/2' 
 '-x, -y, -z' 
 'x-1/2, -y-1/2, z-1/2' 
 
_cell_length_a                    12.2466(1) 
_cell_length_b                    28.2173(4) 
_cell_length_c                    15.1129(2) 
_cell_angle_alpha                 90.00 
_cell_angle_beta                  108.925(1) 
_cell_angle_gamma                 90.00 
_cell_volume                      4940.19(10) 
_cell_formula_units_Z             4 
_cell_measurement_temperature     223(2) 
_cell_measurement_reflns_used     7477
_cell_measurement_theta_min       1.90
_cell_measurement_theta_max       22.30
 
_exptl_crystal_description        'prismatic block'
_exptl_crystal_colour             'green'
_exptl_crystal_size_max           0.5
_exptl_crystal_size_mid           0.3
_exptl_crystal_size_min           0.25
_exptl_crystal_density_meas       ? 
_exptl_crystal_density_diffrn     2.206 
_exptl_crystal_density_method     'not measured' 
_exptl_crystal_F_000              3064 
_exptl_absorpt_coefficient_mu     9.687 
_exptl_absorpt_correction_type    'multiscan'
_exptl_absorpt_correction_T_min   ? 
_exptl_absorpt_correction_T_max   ? 
_exptl_absorpt_process_details    'HKL Scalepack'
 
_exptl_special_details 
; 
 'multi-scan based on symmetry-related measurements'
; 
 
_diffrn_ambient_temperature       223(2) 
_diffrn_radiation_wavelength      0.71073 
_diffrn_radiation_type            MoK\a 
_diffrn_radiation_source          'fine-focus sealed tube' 
_diffrn_radiation_monochromator   graphite 
_diffrn_measurement_device_type   'Nonius Kappa CCD'
_diffrn_measurement_method        '\w- and \f-scans'
_diffrn_detector_area_resol_mean  9 
_diffrn_standards_number          ? 
_diffrn_standards_interval_count  ? 
_diffrn_standards_interval_time   ? 
_diffrn_standards_decay_%         ? 
_diffrn_reflns_number             39819
_diffrn_reflns_av_R_equivalents   0.0561
_diffrn_reflns_av_sigmaI/netI     0.0274 
_diffrn_reflns_limit_h_min        -13
_diffrn_reflns_limit_h_max        13 
_diffrn_reflns_limit_k_min        -31
_diffrn_reflns_limit_k_max        31 
_diffrn_reflns_limit_l_min        -16 
_diffrn_reflns_limit_l_max        16 
_diffrn_reflns_theta_min          1.90 
_diffrn_reflns_theta_max          23.60 
_reflns_number_total              7316 
_reflns_number_gt                 6565 
_reflns_threshold_expression      >2sigma(I) 
 
_computing_data_collection        'Nonius Kappa CCD' 
_computing_cell_refinement        'HKL Scalepack (Otwinoswki & Minor 1997)'
_computing_data_reduction         'Denzo and Scalepack (Otwinoswki & Minor 1997)' 
_computing_structure_solution     'SHELXS-97 (Sheldrick, 1990)' 
_computing_structure_refinement   'SHELXL-97 (Sheldrick, 1997)' 
_computing_molecular_graphics     'ORTEP III for Windows'
_computing_publication_material   'SHELXL-97'
 
_refine_special_details 
; 
 Refinement of F^2^ against ALL reflections.  The weighted R-factor wR and 
 goodness of fit S are based on F^2^, conventional R-factors R are based 
 on F, with F set to zero for negative F^2^. The threshold expression of 
 F^2^ > 2sigma(F^2^) is used only for calculating R-factors(gt) etc. and is 
 not relevant to the choice of reflections for refinement.  R-factors based 
 on F^2^ are statistically about twice as large as those based on F, and R- 
 factors based on ALL data will be even larger. 
; 
 
_refine_ls_structure_factor_coef  Fsqd  
_refine_ls_matrix_type            full 
_refine_ls_weighting_scheme       calc  
_refine_ls_weighting_details 
 'calc w=1/[\s^2^(Fo^2^)+(0.0821P)^2^+56.4134P] where P=(Fo^2^+2Fc^2^)/3' 
_atom_sites_solution_primary      direct 
_atom_sites_solution_secondary    difmap 
_atom_sites_solution_hydrogens    geom 
_refine_ls_hydrogen_treatment     mixed 
_refine_ls_extinction_method      none 
_refine_ls_extinction_coef        ? 
_refine_ls_number_reflns          7316 
_refine_ls_number_parameters      584 
_refine_ls_number_restraints      170 
_refine_ls_R_factor_all           0.0566 
_refine_ls_R_factor_gt            0.0480 
_refine_ls_wR_factor_ref          0.1757 
_refine_ls_wR_factor_gt           0.1525 
_refine_ls_goodness_of_fit_ref    1.223 
_refine_ls_restrained_S_all       1.212 
_refine_ls_shift/su_max           0.001 
_refine_ls_shift/su_mean          0.000 
 
loop_ 
 _atom_site_label 
 _atom_site_type_symbol 
 _atom_site_fract_x 
 _atom_site_fract_y 
 _atom_site_fract_z 
 _atom_site_U_iso_or_equiv 
 _atom_site_adp_type 
 _atom_site_occupancy 
 _atom_site_symmetry_multiplicity 
 _atom_site_calc_flag 
 _atom_site_refinement_flags 
 _atom_site_disorder_assembly 
 _atom_site_disorder_group 
Tl Tl 0.25012(4) 0.00953(2) 0.00919(4) 0.05056(19) Uani 1 1 d . . . 
Au1 Au 0.5000 0.0000 0.0000 0.0556(2) Uani 1 2 d S . . 
Au2 Au 0.0000 0.0000 0.0000 0.0544(2) Uani 1 2 d S . . 
Au3 Au 0.21811(5) 0.063718(18) 0.16749(4) 0.0488(2) Uani 1 1 d . . . 
C1 C 0.4507(10) 0.0549(5) -0.0944(9) 0.055(3) Uani 1 1 d DU . . 
C2 C 0.5128(11) 0.0960(5) -0.0814(9) 0.059(3) Uani 1 1 d DU . . 
C3 C 0.4844(14) 0.1348(5) -0.1415(11) 0.067(3) Uani 1 1 d DU . . 
C4 C 0.3877(14) 0.1306(6) -0.2184(11) 0.083(4) Uani 1 1 d DU . . 
C5 C 0.3230(16) 0.0905(7) -0.2351(11) 0.081(4) Uani 1 1 d DU . . 
C6 C 0.3540(13) 0.0533(6) -0.1719(10) 0.065(3) Uani 1 1 d DU . . 
F1 F 0.6159(8) 0.1013(3) -0.0010(6) 0.073(2) Uani 1 1 d DU . . 
Cl2 Cl 0.5660(6) 0.18669(16) -0.1198(4) 0.0991(16) Uani 1 1 d D . . 
F3 F 0.3550(12) 0.1708(5) -0.2792(8) 0.115(4) Uani 1 1 d DU . . 
Cl4 Cl 0.1999(5) 0.0876(3) -0.3309(4) 0.128(2) Uani 1 1 d D . . 
F5 F 0.2848(9) 0.0128(4) -0.1943(7) 0.081(3) Uani 1 1 d DU . . 
C11 C -0.0383(10) 0.0704(5) -0.0378(9) 0.060(3) Uani 1 1 d DU . . 
C12 C -0.0831(9) 0.1008(5) 0.0137(10) 0.064(3) Uani 1 1 d DU . . 
C13 C -0.1037(11) 0.1481(5) -0.0078(12) 0.075(4) Uani 1 1 d DU . . 
C14 C -0.0807(15) 0.1655(7) -0.0844(11) 0.088(4) Uani 1 1 d DU . . 
C15 C -0.0366(14) 0.1367(6) -0.1380(12) 0.081(4) Uani 1 1 d DU . . 
C16 C -0.0124(14) 0.0896(6) -0.1132(11) 0.074(4) Uani 1 1 d DU . . 
F6 F -0.1063(8) 0.0837(3) 0.0924(6) 0.072(2) Uani 1 1 d DU . . 
Cl7 Cl -0.1510(6) 0.1854(2) 0.0597(5) 0.122(2) Uani 1 1 d D . . 
F8 F -0.1018(11) 0.2129(4) -0.1075(10) 0.124(4) Uani 1 1 d DU . . 
Cl9 Cl -0.0053(6) 0.1583(3) -0.2334(5) 0.136(3) Uani 1 1 d D . . 
F10 F 0.0408(12) 0.0611(4) -0.1648(8) 0.107(4) Uani 1 1 d DU . . 
C21 C 0.2101(9) 0.1304(4) 0.1106(8) 0.048(3) Uani 1 1 d DU . . 
C22 C 0.1702(9) 0.1660(4) 0.1561(8) 0.054(3) Uani 1 1 d DU . . 
C23 C 0.1606(11) 0.2129(4) 0.1317(10) 0.061(3) Uani 1 1 d DU . . 
C24 C 0.1927(12) 0.2257(5) 0.0549(9) 0.060(3) Uani 1 1 d DU . . 
C25 C 0.2341(12) 0.1926(5) 0.0049(9) 0.058(3) Uani 1 1 d DU . . 
C26 C 0.2404(11) 0.1467(4) 0.0347(9) 0.048(3) Uani 1 1 d DU . . 
F11 F 0.1356(8) 0.1537(3) 0.2293(6) 0.071(2) Uani 1 1 d DU . . 
Cl12 Cl 0.1119(6) 0.25424(15) 0.1929(4) 0.1056(18) Uani 1 1 d D . . 
F13 F 0.1894(10) 0.2714(3) 0.0295(7) 0.088(3) Uani 1 1 d DU . . 
Cl14 Cl 0.2715(5) 0.20970(17) -0.0898(3) 0.0854(13) Uani 1 1 d D . . 
F15 F 0.2795(9) 0.1142(3) -0.0147(7) 0.080(3) Uani 1 1 d DU . . 
C31 C 0.2188(11) 0.0035(5) 0.2453(9) 0.058(4) Uani 1 1 d DU . . 
C32 C 0.2752(10) -0.0395(4) 0.2430(8) 0.058(3) Uani 1 1 d DU . . 
C33 C 0.2733(12) -0.0774(5) 0.2992(9) 0.063(4) Uani 1 1 d DU . . 
C34 C 0.2117(14) -0.0731(5) 0.3602(10) 0.071(4) Uani 1 1 d DU . . 
C35 C 0.1558(18) -0.0321(6) 0.3681(11) 0.084(5) Uani 1 1 d DU . . 
C36 C 0.1597(16) 0.0050(5) 0.3099(11) 0.072(5) Uani 1 1 d DU . . 
F16 F 0.3336(9) -0.0447(3) 0.1831(6) 0.073(3) Uani 1 1 d DU . . 
Cl17 Cl 0.3446(5) -0.12837(16) 0.2949(3) 0.0976(17) Uani 1 1 d D . . 
F18 F 0.2090(11) -0.1090(4) 0.4186(7) 0.099(3) Uani 1 1 d DU . . 
Cl19 Cl 0.0787(6) -0.0276(2) 0.4450(4) 0.117(2) Uani 1 1 d D . . 
F20 F 0.1022(11) 0.0452(4) 0.3161(8) 0.102(4) Uani 1 1 d DU . . 
N N 0.4078(10) -0.1286(5) 0.6873(9) 0.068(3) Uani 1 1 d U . . 
C41 C 0.2761(12) -0.1329(6) 0.6524(11) 0.066(4) Uani 1 1 d U . . 
H41A H 0.2572 -0.1667 0.6382 0.079 Uiso 1 1 calc R . . 
H41B H 0.2475 -0.1155 0.5924 0.079 Uiso 1 1 calc R . . 
C42 C 0.2056(14) -0.1157(7) 0.7143(13) 0.077(5) Uani 1 1 d U . . 
H42A H 0.2114 -0.0808 0.7203 0.093 Uiso 1 1 calc R . . 
H42B H 0.2385 -0.1295 0.7776 0.093 Uiso 1 1 calc R . . 
C43 C 0.0752(15) -0.1303(8) 0.6721(16) 0.093(6) Uani 1 1 d U . . 
H43A H 0.0309 -0.1161 0.7098 0.111 Uiso 1 1 calc R . . 
H43B H 0.0431 -0.1180 0.6074 0.111 Uiso 1 1 calc R . . 
C44 C 0.064(2) -0.1811(10) 0.672(3) 0.159(13) Uani 1 1 d U . . 
H44A H 0.0981 -0.1947 0.6271 0.239 Uiso 1 1 calc R . . 
H44B H -0.0182 -0.1895 0.6529 0.239 Uiso 1 1 calc R . . 
H44C H 0.1036 -0.1935 0.7343 0.239 Uiso 1 1 calc R . . 
C45 C 0.4462(13) -0.1517(7) 0.6115(10) 0.069(4) Uani 1 1 d U . . 
H45A H 0.4053 -0.1360 0.5513 0.083 Uiso 1 1 calc R . . 
H45B H 0.4214 -0.1853 0.6059 0.083 Uiso 1 1 calc R . . 
C46 C 0.5763(14) -0.1502(8) 0.6264(12) 0.089(6) Uani 1 1 d U . . 
H46A H 0.6044 -0.1171 0.6353 0.106 Uiso 1 1 calc R . . 
H46B H 0.6189 -0.1686 0.6828 0.106 Uiso 1 1 calc R . . 
C47 C 0.5952(14) -0.1710(7) 0.5421(12) 0.079(5) Uani 1 1 d U . . 
H47A H 0.5643 -0.2037 0.5331 0.095 Uiso 1 1 calc R . . 
H47B H 0.5519 -0.1522 0.4865 0.095 Uiso 1 1 calc R . . 
C48 C 0.7168(16) -0.1720(11) 0.5493(16) 0.122(9) Uani 1 1 d U . . 
H48A H 0.7461 -0.1395 0.5528 0.182 Uiso 1 1 calc R . . 
H48B H 0.7253 -0.1879 0.4942 0.182 Uiso 1 1 calc R . . 
H48C H 0.7607 -0.1894 0.6058 0.182 Uiso 1 1 calc R . . 
C49 C 0.4380(15) -0.0758(7) 0.6965(13) 0.084(4) Uani 1 1 d U . . 
H49A H 0.4093 -0.0624 0.7454 0.101 Uiso 1 1 calc R . . 
H49B H 0.5232 -0.0730 0.7196 0.101 Uiso 1 1 calc R . . 
C50 C 0.394(2) -0.0461(7) 0.6130(14) 0.098(6) Uani 1 1 d U . . 
H50A H 0.3091 -0.0441 0.5945 0.118 Uiso 1 1 calc R . . 
H50B H 0.4143 -0.0607 0.5608 0.118 Uiso 1 1 calc R . . 
C51 C 0.445(2) 0.0029(8) 0.6308(18) 0.115(7) Uani 1 1 d U . . 
H51A H 0.4268 0.0167 0.6847 0.138 Uiso 1 1 calc R . . 
H51B H 0.5297 0.0005 0.6481 0.138 Uiso 1 1 calc R . . 
C52 C 0.403(3) 0.0341(9) 0.553(2) 0.151(11) Uani 1 1 d U . . 
H52A H 0.4264 0.0221 0.5010 0.226 Uiso 1 1 calc R . . 
H52B H 0.4365 0.0657 0.5709 0.226 Uiso 1 1 calc R . . 
H52C H 0.3191 0.0359 0.5342 0.226 Uiso 1 1 calc R . . 
C53 C 0.4592(15) -0.1528(8) 0.7813(11) 0.088(4) Uani 1 1 d U . . 
H53A H 0.4391 -0.1340 0.8291 0.106 Uiso 1 1 calc R . . 
H53B H 0.5444 -0.1524 0.7979 0.106 Uiso 1 1 calc R . . 
C54 C 0.421(2) -0.2041(9) 0.7870(13) 0.110(7) Uani 1 1 d U . . 
H54A H 0.3357 -0.2057 0.7635 0.132 Uiso 1 1 calc R . . 
H54B H 0.4508 -0.2243 0.7464 0.132 Uiso 1 1 calc R . . 
C55 C 0.464(2) -0.2224(11) 0.8846(14) 0.131(9) Uani 1 1 d U . . 
H55A H 0.4414 -0.1996 0.9253 0.157 Uiso 1 1 calc R . . 
H55B H 0.5493 -0.2230 0.9049 0.157 Uiso 1 1 calc R . . 
C56 C 0.423(3) -0.2701(11) 0.9008(18) 0.151(11) Uani 1 1 d U . . 
H56A H 0.3403 -0.2730 0.8667 0.226 Uiso 1 1 calc R . . 
H56B H 0.4367 -0.2745 0.9679 0.226 Uiso 1 1 calc R . . 
H56C H 0.4653 -0.2944 0.8787 0.226 Uiso 1 1 calc R . . 
 
loop_ 
 _atom_site_aniso_label 
 _atom_site_aniso_U_11 
 _atom_site_aniso_U_22 
 _atom_site_aniso_U_33 
 _atom_site_aniso_U_23 
 _atom_site_aniso_U_13 
 _atom_site_aniso_U_12 
Tl 0.0464(3) 0.0559(3) 0.0576(3) -0.0014(2) 0.0282(3) -0.0003(2) 
Au1 0.0561(5) 0.0533(5) 0.0722(5) 0.0060(4) 0.0413(4) 0.0034(3) 
Au2 0.0430(4) 0.0593(5) 0.0630(5) 0.0048(4) 0.0202(4) -0.0040(3) 
Au3 0.0521(3) 0.0444(3) 0.0527(3) 0.0024(2) 0.0211(2) 0.0110(2) 
C1 0.055(7) 0.056(7) 0.066(8) 0.005(6) 0.036(5) 0.007(5) 
C2 0.055(7) 0.055(7) 0.075(8) 0.005(6) 0.035(5) 0.007(5) 
C3 0.083(10) 0.058(8) 0.078(8) 0.010(6) 0.051(6) -0.001(7) 
C4 0.106(13) 0.088(9) 0.065(9) 0.012(7) 0.041(7) 0.024(8) 
C5 0.080(11) 0.106(9) 0.057(9) 0.004(7) 0.023(7) 0.013(8) 
C6 0.058(8) 0.081(8) 0.060(8) -0.008(6) 0.027(6) 0.005(6) 
F1 0.074(6) 0.058(5) 0.090(6) 0.003(4) 0.032(4) -0.015(4) 
Cl2 0.152(5) 0.062(3) 0.103(4) 0.007(2) 0.069(4) -0.013(3) 
F3 0.153(11) 0.127(8) 0.076(7) 0.031(6) 0.050(7) 0.042(8) 
Cl4 0.101(4) 0.196(7) 0.080(4) 0.015(4) 0.020(3) 0.015(4) 
F5 0.093(7) 0.087(6) 0.075(6) -0.008(5) 0.043(5) -0.007(5) 
C11 0.051(8) 0.059(7) 0.064(8) 0.003(6) 0.011(6) -0.012(6) 
C12 0.043(8) 0.070(7) 0.070(8) -0.006(6) 0.005(6) -0.005(7) 
C13 0.043(8) 0.068(7) 0.097(10) -0.012(6) -0.001(8) -0.008(7) 
C14 0.074(12) 0.067(7) 0.099(12) 0.006(7) -0.005(9) -0.016(8) 
C15 0.064(11) 0.082(8) 0.082(11) 0.025(7) 0.003(8) -0.018(8) 
C16 0.067(10) 0.075(8) 0.072(9) 0.012(7) 0.012(7) -0.017(7) 
F6 0.072(6) 0.069(5) 0.076(5) -0.018(4) 0.028(5) 0.002(5) 
Cl7 0.126(5) 0.081(3) 0.146(5) -0.036(3) 0.027(4) 0.012(3) 
F8 0.119(10) 0.065(6) 0.158(11) 0.009(6) 0.001(8) -0.015(6) 
Cl9 0.141(5) 0.128(5) 0.132(5) 0.056(4) 0.033(4) -0.033(4) 
F10 0.150(11) 0.097(7) 0.091(8) 0.023(6) 0.061(7) -0.009(7) 
C21 0.043(7) 0.044(6) 0.053(7) -0.001(5) 0.012(5) 0.004(5) 
C22 0.065(9) 0.045(6) 0.052(7) -0.004(5) 0.019(6) 0.006(6) 
C23 0.064(9) 0.041(6) 0.083(9) -0.006(6) 0.031(8) -0.001(6) 
C24 0.059(9) 0.041(6) 0.079(9) 0.006(6) 0.022(7) 0.004(6) 
C25 0.057(9) 0.058(6) 0.059(8) 0.006(6) 0.018(7) 0.004(6) 
C26 0.041(7) 0.050(6) 0.057(7) -0.002(5) 0.019(6) 0.004(6) 
F11 0.090(6) 0.056(5) 0.084(6) -0.006(4) 0.054(5) 0.004(4) 
Cl12 0.167(5) 0.046(2) 0.131(4) -0.015(2) 0.086(4) 0.007(3) 
F13 0.117(8) 0.046(4) 0.107(7) 0.014(5) 0.045(6) 0.002(5) 
Cl14 0.103(3) 0.084(3) 0.078(3) 0.025(2) 0.043(3) 0.011(3) 
F15 0.112(8) 0.064(5) 0.090(6) 0.014(5) 0.070(6) 0.024(5) 
C31 0.076(10) 0.055(7) 0.051(8) 0.007(6) 0.032(7) 0.019(7) 
C32 0.076(10) 0.059(7) 0.042(7) 0.006(6) 0.025(6) 0.019(7) 
C33 0.081(11) 0.051(7) 0.053(8) 0.007(6) 0.018(6) 0.019(7) 
C34 0.104(13) 0.060(7) 0.052(8) 0.011(6) 0.030(8) 0.012(8) 
C35 0.128(16) 0.078(9) 0.071(11) 0.013(8) 0.066(11) 0.023(10) 
C36 0.098(13) 0.057(8) 0.078(11) 0.012(7) 0.054(9) 0.025(8) 
F16 0.105(7) 0.066(5) 0.064(5) 0.010(4) 0.049(5) 0.040(5) 
Cl17 0.151(5) 0.062(3) 0.085(3) 0.017(2) 0.045(3) 0.049(3) 
F18 0.152(10) 0.076(6) 0.072(6) 0.027(5) 0.042(6) 0.006(6) 
Cl19 0.144(5) 0.140(5) 0.104(4) 0.024(4) 0.090(4) 0.032(4) 
F20 0.138(10) 0.084(6) 0.114(8) 0.023(6) 0.084(8) 0.058(7) 
N 0.039(5) 0.109(7) 0.056(6) -0.026(5) 0.015(5) -0.008(6) 
C41 0.048(6) 0.094(11) 0.057(8) -0.020(8) 0.019(5) -0.017(7) 
C42 0.063(8) 0.101(13) 0.079(11) -0.009(9) 0.040(8) -0.002(8) 
C43 0.051(8) 0.114(12) 0.137(17) -0.004(13) 0.063(10) -0.005(10) 
C44 0.106(19) 0.123(14) 0.27(4) -0.05(2) 0.09(2) -0.026(14) 
C45 0.051(7) 0.112(12) 0.045(7) -0.023(8) 0.018(6) -0.011(8) 
C46 0.050(7) 0.159(19) 0.063(10) -0.022(10) 0.025(7) -0.016(10) 
C47 0.063(9) 0.108(14) 0.079(10) 0.000(9) 0.040(9) 0.013(10) 
C48 0.061(10) 0.21(3) 0.102(15) 0.003(17) 0.040(11) 0.037(14) 
C49 0.064(10) 0.117(8) 0.088(10) -0.045(7) 0.048(9) -0.033(8) 
C50 0.121(17) 0.102(10) 0.093(12) -0.033(7) 0.064(12) -0.054(11) 
C51 0.14(2) 0.101(11) 0.134(18) -0.062(9) 0.082(17) -0.047(13) 
C52 0.19(3) 0.086(14) 0.21(3) -0.023(13) 0.12(2) -0.036(18) 
C53 0.059(9) 0.162(12) 0.045(7) -0.014(8) 0.018(6) -0.003(10) 
C54 0.136(19) 0.125(12) 0.061(9) -0.009(9) 0.019(11) 0.033(13) 
C55 0.120(19) 0.22(2) 0.062(10) 0.012(13) 0.041(12) -0.036(19) 
C56 0.21(3) 0.16(2) 0.096(17) -0.003(14) 0.07(2) -0.01(2) 
 
_geom_special_details 
; 
 All esds (except the esd in the dihedral angle between two l.s. planes) 
 are estimated using the full covariance matrix.  The cell esds are taken 
 into account individually in the estimation of esds in distances, angles 
 and torsion angles; correlations between esds in cell parameters are only 
 used when they are defined by crystal symmetry.  An approximate (isotropic) 
 treatment of cell esds is used for estimating esds involving l.s. planes. 
; 
 
loop_ 
 _geom_bond_atom_site_label_1 
 _geom_bond_atom_site_label_2 
 _geom_bond_distance 
 _geom_bond_site_symmetry_2 
 _geom_bond_publ_flag 
Tl Au3 2.9704(7) . ? 
Tl Au2 3.0329(5) . ? 
Tl Au1 3.1196(5) . ? 
Au1 C1 2.060(14) 3_655 ? 
Au1 C1 2.060(14) . ? 
Au1 Tl 3.1196(5) 3_655 ? 
Au2 C11 2.077(15) . ? 
Au2 C11 2.077(15) 3 ? 
Au2 Tl 3.0329(5) 3 ? 
Au3 C21 2.058(13) . ? 
Au3 C31 2.065(14) . ? 
C1 C2 1.364(15) . ? 
C1 C6 1.370(16) . ? 
C2 C3 1.394(17) . ? 
C2 F1 1.448(17) . ? 
C3 C4 1.369(18) . ? 
C3 Cl2 1.743(16) . ? 
C4 C5 1.356(18) . ? 
C4 F3 1.43(2) . ? 
C5 C6 1.386(19) . ? 
C5 Cl4 1.721(17) . ? 
C6 F5 1.398(18) . ? 
C11 C12 1.385(16) . ? 
C11 C16 1.389(16) . ? 
C12 C13 1.378(19) . ? 
C12 F6 1.396(18) . ? 
C13 C14 1.368(18) . ? 
C13 Cl7 1.694(18) . ? 
C14 C15 1.376(19) . ? 
C14 F8 1.39(2) . ? 
C15 C16 1.385(19) . ? 
C15 Cl9 1.719(18) . ? 
C16 F10 1.42(2) . ? 
C21 C22 1.392(14) . ? 
C21 C26 1.393(14) . ? 
C22 F11 1.351(15) . ? 
C22 C23 1.370(16) . ? 
C23 C24 1.388(15) . ? 
C23 Cl12 1.712(14) . ? 
C24 F13 1.342(16) . ? 
C24 C25 1.396(15) . ? 
C25 C26 1.365(16) . ? 
C25 Cl14 1.708(14) . ? 
C26 F15 1.363(15) . ? 
C31 C36 1.392(16) . ? 
C31 C32 1.402(15) . ? 
C32 F16 1.331(15) . ? 
C32 C33 1.371(17) . ? 
C33 C34 1.373(16) . ? 
C33 Cl17 1.693(14) . ? 
C34 F18 1.353(17) . ? 
C34 C35 1.370(16) . ? 
C35 C36 1.376(18) . ? 
C35 Cl19 1.723(15) . ? 
C36 F20 1.356(16) . ? 
N C45 1.519(18) . ? 
N C53 1.52(2) . ? 
N C41 1.530(18) . ? 
N C49 1.53(2) . ? 
C41 C42 1.54(2) . ? 
C42 C43 1.57(2) . ? 
C43 C44 1.44(3) . ? 
C45 C46 1.54(2) . ? 
C46 C47 1.49(2) . ? 
C47 C48 1.46(2) . ? 
C49 C50 1.46(3) . ? 
C50 C51 1.50(3) . ? 
C51 C52 1.42(4) . ? 
C53 C54 1.53(3) . ? 
C54 C55 1.49(3) . ? 
C55 C56 1.48(4) . ? 
 
loop_ 
 _geom_angle_atom_site_label_1 
 _geom_angle_atom_site_label_2 
 _geom_angle_atom_site_label_3 
 _geom_angle 
 _geom_angle_site_symmetry_1 
 _geom_angle_site_symmetry_3 
 _geom_angle_publ_flag 
Au3 Tl Au2 71.783(15) . . ? 
Au3 Tl Au1 117.89(2) . . ? 
Au2 Tl Au1 168.83(2) . . ? 
C1 Au1 C1 180.0(8) 3_655 . ? 
C1 Au1 Tl 96.1(3) 3_655 . ? 
C1 Au1 Tl 83.9(3) . . ? 
C1 Au1 Tl 83.9(3) 3_655 3_655 ? 
C1 Au1 Tl 96.1(3) . 3_655 ? 
Tl Au1 Tl 180.00(2) . 3_655 ? 
C11 Au2 C11 180.0(8) . 3 ? 
C11 Au2 Tl 86.4(3) . 3 ? 
C11 Au2 Tl 93.6(3) 3 3 ? 
C11 Au2 Tl 93.6(3) . . ? 
C11 Au2 Tl 86.4(3) 3 . ? 
Tl Au2 Tl 180.00(2) 3 . ? 
C21 Au3 C31 168.9(4) . . ? 
C21 Au3 Tl 97.8(3) . . ? 
C31 Au3 Tl 93.3(3) . . ? 
C2 C1 C6 116.0(14) . . ? 
C2 C1 Au1 121.0(10) . . ? 
C6 C1 Au1 123.0(10) . . ? 
C1 C2 C3 124.3(14) . . ? 
C1 C2 F1 120.2(12) . . ? 
C3 C2 F1 115.5(12) . . ? 
C4 C3 C2 116.7(14) . . ? 
C4 C3 Cl2 121.3(12) . . ? 
C2 C3 Cl2 122.0(13) . . ? 
C5 C4 C3 121.5(17) . . ? 
C5 C4 F3 121.1(14) . . ? 
C3 C4 F3 117.4(14) . . ? 
C4 C5 C6 119.3(15) . . ? 
C4 C5 Cl4 119.7(14) . . ? 
C6 C5 Cl4 120.9(15) . . ? 
C1 C6 C5 122.1(14) . . ? 
C1 C6 F5 121.5(13) . . ? 
C5 C6 F5 116.3(14) . . ? 
C12 C11 C16 117.1(15) . . ? 
C12 C11 Au2 122.2(10) . . ? 
C16 C11 Au2 120.6(11) . . ? 
C13 C12 C11 122.9(15) . . ? 
C13 C12 F6 117.5(14) . . ? 
C11 C12 F6 119.5(13) . . ? 
C14 C13 C12 118.3(16) . . ? 
C14 C13 Cl7 119.4(14) . . ? 
C12 C13 Cl7 122.2(15) . . ? 
C13 C14 C15 121.0(18) . . ? 
C13 C14 F8 119.1(16) . . ? 
C15 C14 F8 119.9(15) . . ? 
C14 C15 C16 119.8(16) . . ? 
C14 C15 Cl9 121.4(14) . . ? 
C16 C15 Cl9 118.8(15) . . ? 
C15 C16 C11 120.8(16) . . ? 
C15 C16 F10 119.3(15) . . ? 
C11 C16 F10 119.9(14) . . ? 
C22 C21 C26 113.5(12) . . ? 
C22 C21 Au3 115.5(8) . . ? 
C26 C21 Au3 131.0(9) . . ? 
F11 C22 C23 116.6(11) . . ? 
F11 C22 C21 118.2(11) . . ? 
C23 C22 C21 125.2(12) . . ? 
C22 C23 C24 117.0(12) . . ? 
C22 C23 Cl12 121.8(11) . . ? 
C24 C23 Cl12 121.2(10) . . ? 
F13 C24 C23 119.8(11) . . ? 
F13 C24 C25 118.1(11) . . ? 
C23 C24 C25 122.0(13) . . ? 
C26 C25 C24 116.6(12) . . ? 
C26 C25 Cl14 122.9(11) . . ? 
C24 C25 Cl14 120.5(11) . . ? 
F15 C26 C25 116.7(11) . . ? 
F15 C26 C21 117.7(11) . . ? 
C25 C26 C21 125.6(12) . . ? 
C36 C31 C32 114.6(13) . . ? 
C36 C31 Au3 117.9(9) . . ? 
C32 C31 Au3 127.5(9) . . ? 
F16 C32 C33 117.1(12) . . ? 
F16 C32 C31 119.3(11) . . ? 
C33 C32 C31 123.6(12) . . ? 
C32 C33 C34 118.0(12) . . ? 
C32 C33 Cl17 121.8(11) . . ? 
C34 C33 Cl17 120.3(11) . . ? 
F18 C34 C35 117.2(12) . . ? 
F18 C34 C33 120.4(12) . . ? 
C35 C34 C33 122.3(14) . . ? 
C34 C35 C36 117.6(13) . . ? 
C34 C35 Cl19 121.3(12) . . ? 
C36 C35 Cl19 121.0(12) . . ? 
F20 C36 C35 117.7(13) . . ? 
F20 C36 C31 118.3(12) . . ? 
C35 C36 C31 124.0(13) . . ? 
C45 N C53 112.1(14) . . ? 
C45 N C41 104.8(10) . . ? 
C53 N C41 111.0(13) . . ? 
C45 N C49 111.2(13) . . ? 
C53 N C49 109.8(13) . . ? 
C41 N C49 107.8(13) . . ? 
N C41 C42 120.1(12) . . ? 
C41 C42 C43 111.5(14) . . ? 
C44 C43 C42 110.3(19) . . ? 
N C45 C46 116.0(12) . . ? 
C47 C46 C45 107.8(13) . . ? 
C48 C47 C46 112.5(16) . . ? 
C50 C49 N 118.0(14) . . ? 
C49 C50 C51 111.1(19) . . ? 
C52 C51 C50 114(2) . . ? 
N C53 C54 115.9(14) . . ? 
C55 C54 C53 111.6(19) . . ? 
C54 C55 C56 117(2) . . ? 
 
_diffrn_measured_fraction_theta_max    0.990 
_diffrn_reflns_theta_full              23.60 
_diffrn_measured_fraction_theta_full   0.990 
_refine_diff_density_max    1.327 
_refine_diff_density_min   -1.362 
_refine_diff_density_rms    0.266 


 
END of data for 3#########################################

 
data_complex 4
 
 
_audit_creation_method            SHELXL-97
_chemical_name_systematic
;
 ?
;
_chemical_name_common             ?
_chemical_melting_point           ?
_chemical_formula_moiety          ?
_chemical_formula_sum
 'C40 H36 Au2 Cl14 F6 N Tl'
_chemical_formula_weight          1739.30
 
loop_
 _atom_type_symbol
 _atom_type_description
 _atom_type_scat_dispersion_real
 _atom_type_scat_dispersion_imag
 _atom_type_scat_source
 'C'  'C'   0.0033   0.0016
 'International Tables Vol C Tables 4.2.6.8 and 6.1.1.4'
 'H'  'H'   0.0000   0.0000
 'International Tables Vol C Tables 4.2.6.8 and 6.1.1.4'
 'Au'  'Au'  -2.0133   8.8022
 'International Tables Vol C Tables 4.2.6.8 and 6.1.1.4'
 'Cl'  'Cl'   0.1484   0.1585
 'International Tables Vol C Tables 4.2.6.8 and 6.1.1.4'
 'F'  'F'   0.0171   0.0103
 'International Tables Vol C Tables 4.2.6.8 and 6.1.1.4'
 'N'  'N'   0.0061   0.0033
 'International Tables Vol C Tables 4.2.6.8 and 6.1.1.4'
 'Tl'  'Tl'  -2.8358   9.6688
 'International Tables Vol C Tables 4.2.6.8 and 6.1.1.4'
 
_symmetry_cell_setting            'Monoclinic'
_symmetry_space_group_name_H-M    'P21/n'
 
loop_
 _symmetry_equiv_pos_as_xyz
 'x, y, z'
 '-x+1/2, y+1/2, -z+1/2'
 '-x, -y, -z'
 'x-1/2, -y-1/2, z-1/2'
 
_cell_length_a                    12.0920(1)
_cell_length_b                    28.5736(3)
_cell_length_c                    15.4221(2)
_cell_angle_alpha                 90.00
_cell_angle_beta                  107.365(1)
_cell_angle_gamma                 90.00
_cell_volume                      5085.66(9)
_cell_formula_units_Z             4
_cell_measurement_temperature     173(2)
_cell_measurement_reflns_used     11696
_cell_measurement_theta_min       1.89
_cell_measurement_theta_max       27.88
 
_exptl_crystal_description        'prismatic block'
_exptl_crystal_colour             'yellow'
_exptl_crystal_size_max           0.25
_exptl_crystal_size_mid           0.18
_exptl_crystal_size_min           0.10
_exptl_crystal_density_meas       ?
_exptl_crystal_density_diffrn     2.272
_exptl_crystal_density_method     'not measured'
_exptl_crystal_F_000              3256
_exptl_absorpt_coefficient_mu     9.706
_exptl_absorpt_correction_type    'multiscan'
_exptl_absorpt_correction_T_min   0.1952
_exptl_absorpt_correction_T_max   0.4436
_exptl_absorpt_process_details    'Scalepack'
 
_exptl_special_details
;
 'multi-scan based on symmetry related measurements'
;
 
_diffrn_ambient_temperature       173(2)
_diffrn_radiation_wavelength      0.71073
_diffrn_radiation_type            MoK\a
_diffrn_radiation_source          'fine-focus sealed tube'
_diffrn_radiation_monochromator   graphite
_diffrn_measurement_device_type   'Nonius KappaCCD'
_diffrn_measurement_method        '\w- and \f-scans'
_diffrn_detector_area_resol_mean  9
_diffrn_standards_number          ?
_diffrn_standards_interval_count  ?
_diffrn_standards_interval_time   ?
_diffrn_standards_decay_%         ?
_diffrn_reflns_number             42397
_diffrn_reflns_av_R_equivalents   0.0532
_diffrn_reflns_av_sigmaI/netI     0.0425
_diffrn_reflns_limit_h_min        -15
_diffrn_reflns_limit_h_max        15
_diffrn_reflns_limit_k_min        -37
_diffrn_reflns_limit_k_max        37
_diffrn_reflns_limit_l_min        -20
_diffrn_reflns_limit_l_max        19
_diffrn_reflns_theta_min          0.21
_diffrn_reflns_theta_max          27.88
_reflns_number_total              12086
_reflns_number_gt                 9699
_reflns_threshold_expression      >2sigma(I)
 
_computing_data_collection        'Nonius Kappa CCD' 
_computing_cell_refinement        'HKL Scalepack (Otwinoswki & Minor 1997)'
_computing_data_reduction         'Denzo and Scalepack (Otwinoswki & Minor 1997)' 
_computing_structure_solution     'SHELXS-97 (Sheldrick, 1990)' 
_computing_structure_refinement   'SHELXL-97 (Sheldrick, 1997)' 
_computing_molecular_graphics     'ORTEP III for Windows'
_computing_publication_material   'SHELXL-97'
 
_refine_special_details
;
 Refinement of F^2^ against ALL reflections.  The weighted R-factor wR and
 goodness of fit S are based on F^2^, conventional R-factors R are based
 on F, with F set to zero for negative F^2^. The threshold expression of
 F^2^ > 2sigma(F^2^) is used only for calculating R-factors(gt) etc. and is
 not relevant to the choice of reflections for refinement.  R-factors based
 on F^2^ are statistically about twice as large as those based on F, and R-
 factors based on ALL data will be even larger.
;
 
_refine_ls_structure_factor_coef  Fsqd
_refine_ls_matrix_type            full
_refine_ls_weighting_scheme       calc
_refine_ls_weighting_details
 'calc w=1/[\s^2^(Fo^2^)+(0.0327P)^2^+26.2180P] where P=(Fo^2^+2Fc^2^)/3'
_atom_sites_solution_primary      direct
_atom_sites_solution_secondary    difmap
_atom_sites_solution_hydrogens    geom
_refine_ls_hydrogen_treatment     mixed
_refine_ls_extinction_method      none
_refine_ls_extinction_coef        ?
_refine_ls_number_reflns          12086
_refine_ls_number_parameters      584
_refine_ls_number_restraints      166
_refine_ls_R_factor_all           0.0590
_refine_ls_R_factor_gt            0.0400
_refine_ls_wR_factor_ref          0.0896
_refine_ls_wR_factor_gt           0.0828
_refine_ls_goodness_of_fit_ref    1.056
_refine_ls_restrained_S_all       1.050
_refine_ls_shift/su_max           0.135
_refine_ls_shift/su_mean          0.001
 
loop_
 _atom_site_label
 _atom_site_type_symbol
 _atom_site_fract_x
 _atom_site_fract_y
 _atom_site_fract_z
 _atom_site_U_iso_or_equiv
 _atom_site_adp_type
 _atom_site_occupancy
 _atom_site_symmetry_multiplicity
 _atom_site_calc_flag
 _atom_site_refinement_flags
 _atom_site_disorder_assembly
 _atom_site_disorder_group
Tl Tl 0.24588(2) 0.010313(9) 0.480333(16) 0.02870(7) Uani 1 1 d . . .
Au1 Au 0.0000 0.0000 0.5000 0.02787(8) Uani 1 2 d S . .
Au2 Au 0.5000 0.0000 0.5000 0.02678(8) Uani 1 2 d S . .
Au3 Au 0.27818(2) 0.064080(8) 0.320155(16) 0.02743(7) Uani 1 1 d . . .
C1 C 0.0467(5) 0.05453(19) 0.5895(4) 0.0271(13) Uani 1 1 d DU . .
C2 C 0.1388(5) 0.0540(2) 0.6693(4) 0.0314(14) Uani 1 1 d DU . .
C3 C 0.1709(5) 0.0913(2) 0.7288(4) 0.0329(14) Uani 1 1 d DU . .
C4 C 0.1068(5) 0.1326(2) 0.7090(4) 0.0339(14) Uani 1 1 d DU . .
C5 C 0.0142(5) 0.1357(2) 0.6309(4) 0.0313(14) Uani 1 1 d DU . .
C6 C -0.0109(5) 0.0975(2) 0.5736(4) 0.0303(13) Uani 1 1 d DU . .
Cl1 Cl 0.21780(16) 0.00185(6) 0.69792(12) 0.0427(4) Uani 1 1 d D . .
Cl2 Cl 0.28753(17) 0.08784(8) 0.82576(12) 0.0504(5) Uani 1 1 d D . .
Cl3 Cl 0.14230(19) 0.17971(7) 0.78129(13) 0.0537(5) Uani 1 1 d D . .
Cl4 Cl -0.06590(17) 0.18630(6) 0.60682(13) 0.0463(4) Uani 1 1 d D . .
Cl5 Cl -0.12814(16) 0.10218(6) 0.47495(13) 0.0456(4) Uani 1 1 d D . .
C11 C 0.5312(5) 0.0694(2) 0.5293(4) 0.0283(13) Uani 1 1 d DU . .
C12 C 0.5742(4) 0.1001(2) 0.4759(4) 0.0300(13) Uani 1 1 d DU . .
C13 C 0.5991(5) 0.1468(2) 0.4965(5) 0.0399(16) Uani 1 1 d DU . .
C14 C 0.5832(6) 0.1649(2) 0.5754(5) 0.0441(17) Uani 1 1 d DU . .
C15 C 0.5393(6) 0.1364(2) 0.6305(5) 0.0412(16) Uani 1 1 d DU . .
C16 C 0.5127(5) 0.0902(2) 0.6056(4) 0.0333(14) Uani 1 1 d DU . .
Cl6 Cl 0.59055(17) 0.07820(7) 0.37557(13) 0.0472(4) Uani 1 1 d D . .
Cl7 Cl 0.64363(17) 0.18337(7) 0.42496(16) 0.0563(5) Uani 1 1 d D . .
Cl8 Cl 0.6171(2) 0.22180(8) 0.6050(2) 0.0816(8) Uani 1 1 d D . .
Cl9 Cl 0.5190(2) 0.15882(8) 0.72876(17) 0.0693(7) Uani 1 1 d D . .
Cl10 Cl 0.44862(18) 0.05695(7) 0.67092(13) 0.0503(5) Uani 1 1 d D . .
C21 C 0.2764(5) 0.0046(2) 0.2464(4) 0.0327(14) Uani 1 1 d DU . .
C22 C 0.2201(5) -0.0374(2) 0.2504(4) 0.0356(15) Uani 1 1 d DU . .
C23 C 0.2225(6) -0.0769(2) 0.1987(4) 0.0377(15) Uani 1 1 d DU . .
C24 C 0.2850(7) -0.0748(2) 0.1374(5) 0.0424(17) Uani 1 1 d DU . .
C25 C 0.3447(6) -0.0341(2) 0.1295(4) 0.0381(15) Uani 1 1 d DU . .
C26 C 0.3382(6) 0.0040(2) 0.1832(4) 0.0354(15) Uani 1 1 d DU . .
F11 F 0.1539(4) -0.04143(13) 0.3111(2) 0.0408(9) Uani 1 1 d DU . .
Cl12 Cl 0.1482(2) -0.12687(7) 0.20702(15) 0.0635(6) Uani 1 1 d D . .
F13 F 0.2897(5) -0.11275(18) 0.0847(3) 0.0634(13) Uani 1 1 d DU . .
Cl14 Cl 0.4253(2) -0.03240(9) 0.05375(14) 0.0613(6) Uani 1 1 d D . .
F15 F 0.3984(4) 0.04396(15) 0.1720(3) 0.0503(11) Uani 1 1 d DU . .
C31 C 0.2897(5) 0.1295(2) 0.3773(4) 0.0259(12) Uani 1 1 d DU . .
C32 C 0.3298(5) 0.1653(2) 0.3341(4) 0.0301(13) Uani 1 1 d DU . .
C33 C 0.3417(5) 0.2114(2) 0.3615(4) 0.0336(14) Uani 1 1 d DU . .
C34 C 0.3130(6) 0.2231(2) 0.4387(4) 0.0346(15) Uani 1 1 d DU . .
C35 C 0.2735(6) 0.1894(2) 0.4863(4) 0.0343(14) Uani 1 1 d DU . .
C36 C 0.2623(5) 0.1443(2) 0.4540(4) 0.0319(14) Uani 1 1 d DU . .
F16 F 0.3626(3) 0.15470(13) 0.2583(3) 0.0388(9) Uani 1 1 d DU . .
Cl17 Cl 0.39168(19) 0.25373(6) 0.30237(15) 0.0524(5) Uani 1 1 d D . .
F18 F 0.3214(4) 0.26813(15) 0.4672(3) 0.0548(12) Uani 1 1 d DU . .
Cl19 Cl 0.2379(2) 0.20487(7) 0.58325(14) 0.0547(5) Uani 1 1 d D . .
F20 F 0.2188(4) 0.11201(13) 0.5019(3) 0.0441(10) Uani 1 1 d DU . .
N N 0.9133(5) 0.1331(2) 0.1734(4) 0.0378(13) Uani 1 1 d U . .
C41 C 0.7834(6) 0.1417(3) 0.1387(5) 0.0377(16) Uani 1 1 d U . .
H41A H 0.7532 0.1268 0.0783 0.045 Uiso 1 1 calc R . .
H41B H 0.7704 0.1759 0.1301 0.045 Uiso 1 1 calc R . .
C42 C 0.7128(6) 0.1241(3) 0.1988(6) 0.0471(19) Uani 1 1 d U . .
H42A H 0.7450 0.1369 0.2608 0.057 Uiso 1 1 calc R . .
H42B H 0.7176 0.0895 0.2028 0.057 Uiso 1 1 calc R . .
C43 C 0.5855(6) 0.1391(3) 0.1595(6) 0.0492(19) Uani 1 1 d U . .
H43A H 0.5560 0.1284 0.0956 0.059 Uiso 1 1 calc R . .
H43B H 0.5389 0.1236 0.1942 0.059 Uiso 1 1 calc R . .
C44 C 0.5696(7) 0.1913(3) 0.1626(7) 0.060(2) Uani 1 1 d U . .
H44A H 0.6016 0.2023 0.2253 0.090 Uiso 1 1 calc R . .
H44B H 0.4869 0.1989 0.1405 0.090 Uiso 1 1 calc R . .
H44C H 0.6101 0.2067 0.1241 0.090 Uiso 1 1 calc R . .
C45 C 0.9401(7) 0.0812(3) 0.1859(5) 0.0489(18) Uani 1 1 d U . .
H45A H 1.0253 0.0772 0.2067 0.059 Uiso 1 1 calc R . .
H45B H 0.9098 0.0694 0.2348 0.059 Uiso 1 1 calc R . .
C46 C 0.8911(7) 0.0512(3) 0.1023(5) 0.0482(18) Uani 1 1 d U . .
H46A H 0.9135 0.0644 0.0506 0.058 Uiso 1 1 calc R . .
H46B H 0.8055 0.0508 0.0858 0.058 Uiso 1 1 calc R . .
C47 C 0.9377(9) 0.0012(3) 0.1214(7) 0.066(2) Uani 1 1 d U . .
H47A H 1.0228 0.0017 0.1337 0.080 Uiso 1 1 calc R . .
H47B H 0.9212 -0.0105 0.1767 0.080 Uiso 1 1 calc R . .
C48 C 0.8851(10) -0.0322(3) 0.0433(8) 0.083(3) Uani 1 1 d U . .
H48A H 0.8006 -0.0322 0.0295 0.124 Uiso 1 1 calc R . .
H48B H 0.9147 -0.0639 0.0604 0.124 Uiso 1 1 calc R . .
H48C H 0.9062 -0.0221 -0.0105 0.124 Uiso 1 1 calc R . .
C49 C 0.9608(6) 0.1544(3) 0.1010(5) 0.0415(17) Uani 1 1 d U . .
H49A H 0.9190 0.1401 0.0418 0.050 Uiso 1 1 calc R . .
H49B H 0.9420 0.1882 0.0966 0.050 Uiso 1 1 calc R . .
C50 C 1.0898(6) 0.1493(3) 0.1147(5) 0.0481(19) Uani 1 1 d U . .
H50A H 1.1137 0.1164 0.1303 0.058 Uiso 1 1 calc R . .
H50B H 1.1336 0.1695 0.1654 0.058 Uiso 1 1 calc R . .
C51 C 1.1167(6) 0.1632(3) 0.0274(5) 0.0453(18) Uani 1 1 d U . .
H51A H 1.0786 0.1409 -0.0215 0.054 Uiso 1 1 calc R . .
H51B H 1.0843 0.1947 0.0084 0.054 Uiso 1 1 calc R . .
C52 C 1.2458(7) 0.1638(5) 0.0396(6) 0.080(3) Uani 1 1 d U . .
H52A H 1.2838 0.1861 0.0875 0.120 Uiso 1 1 calc R . .
H52B H 1.2594 0.1731 -0.0175 0.120 Uiso 1 1 calc R . .
H52C H 1.2778 0.1324 0.0567 0.120 Uiso 1 1 calc R . .
C53 C 0.9665(7) 0.1559(3) 0.2653(5) 0.0481(17) Uani 1 1 d U . .
H53A H 0.9403 0.1383 0.3109 0.058 Uiso 1 1 calc R . .
H53B H 1.0517 0.1523 0.2815 0.058 Uiso 1 1 calc R . .
C54 C 0.9399(9) 0.2071(3) 0.2737(6) 0.065(2) Uani 1 1 d U . .
H54A H 0.9790 0.2260 0.2375 0.078 Uiso 1 1 calc R . .
H54B H 0.8554 0.2122 0.2484 0.078 Uiso 1 1 calc R . .
C55 C 0.9786(10) 0.2232(4) 0.3692(6) 0.090(4) Uani 1 1 d U . .
H55A H 0.9506 0.2001 0.4055 0.108 Uiso 1 1 calc R . .
H55B H 1.0643 0.2216 0.3898 0.108 Uiso 1 1 calc R . .
C56 C 0.9463(12) 0.2690(4) 0.3930(7) 0.100(4) Uani 1 1 d U . .
H56A H 0.9129 0.2873 0.3376 0.150 Uiso 1 1 calc R . .
H56B H 1.0151 0.2851 0.4315 0.150 Uiso 1 1 calc R . .
H56C H 0.8890 0.2657 0.4261 0.150 Uiso 1 1 calc R . .
 
loop_
 _atom_site_aniso_label
 _atom_site_aniso_U_11
 _atom_site_aniso_U_22
 _atom_site_aniso_U_33
 _atom_site_aniso_U_23
 _atom_site_aniso_U_13
 _atom_site_aniso_U_12
Tl 0.02619(13) 0.03129(13) 0.03174(13) 0.00235(10) 0.01340(10) 0.00080(10)
Au1 0.02610(17) 0.02361(17) 0.03769(19) -0.00379(14) 0.01531(14) -0.00099(13)
Au2 0.02368(17) 0.02613(17) 0.03249(17) 0.00085(14) 0.01138(13) 0.00073(13)
Au3 0.03087(13) 0.02379(12) 0.02911(13) 0.00007(10) 0.01124(10) -0.00393(10)
C1 0.030(3) 0.020(3) 0.037(3) -0.003(3) 0.019(3) -0.001(2)
C2 0.042(4) 0.029(3) 0.030(3) 0.006(3) 0.020(3) 0.009(3)
C3 0.029(3) 0.045(4) 0.029(3) -0.001(3) 0.015(3) 0.000(3)
C4 0.042(4) 0.033(3) 0.032(3) -0.008(3) 0.020(3) -0.008(3)
C5 0.034(3) 0.026(3) 0.039(3) -0.004(3) 0.018(3) 0.000(3)
C6 0.025(3) 0.031(3) 0.037(3) -0.002(3) 0.012(3) -0.001(3)
Cl1 0.0466(10) 0.0414(10) 0.0434(9) 0.0054(8) 0.0186(8) 0.0106(8)
Cl2 0.0492(11) 0.0641(13) 0.0339(9) -0.0058(9) 0.0063(8) 0.0052(9)
Cl3 0.0650(13) 0.0482(11) 0.0478(11) -0.0161(9) 0.0166(10) -0.0021(10)
Cl4 0.0550(11) 0.0291(9) 0.0555(11) -0.0046(8) 0.0175(9) 0.0089(8)
Cl5 0.0407(10) 0.0369(10) 0.0518(10) -0.0032(8) 0.0027(8) 0.0074(8)
C11 0.025(3) 0.029(3) 0.029(3) 0.005(3) 0.006(2) 0.006(3)
C12 0.021(3) 0.028(3) 0.039(3) 0.004(3) 0.006(3) 0.001(3)
C13 0.030(4) 0.031(3) 0.054(4) 0.014(3) 0.005(3) 0.005(3)
C14 0.038(4) 0.022(3) 0.065(5) -0.002(3) 0.004(3) 0.007(3)
C15 0.036(4) 0.034(4) 0.046(4) -0.005(3) 0.001(3) 0.010(3)
C16 0.028(3) 0.034(3) 0.036(3) 0.001(3) 0.007(3) 0.005(3)
Cl6 0.0454(10) 0.0521(11) 0.0463(10) 0.0120(9) 0.0168(8) -0.0027(9)
Cl7 0.0470(11) 0.0386(10) 0.0790(14) 0.0269(10) 0.0121(10) -0.0019(8)
Cl8 0.0809(17) 0.0338(11) 0.121(2) -0.0093(13) 0.0169(16) 0.0027(11)
Cl9 0.0856(17) 0.0545(13) 0.0712(15) -0.0277(12) 0.0285(13) 0.0089(12)
Cl10 0.0542(12) 0.0554(12) 0.0472(10) -0.0016(9) 0.0242(9) 0.0047(9)
C21 0.034(4) 0.033(3) 0.031(3) -0.001(3) 0.010(3) -0.003(3)
C22 0.046(4) 0.038(4) 0.024(3) 0.002(3) 0.013(3) -0.009(3)
C23 0.052(4) 0.027(3) 0.031(3) 0.001(3) 0.008(3) -0.005(3)
C24 0.058(5) 0.035(4) 0.034(4) -0.008(3) 0.015(3) -0.001(3)
C25 0.041(4) 0.047(4) 0.029(3) -0.004(3) 0.015(3) -0.005(3)
C26 0.042(4) 0.035(3) 0.029(3) -0.002(3) 0.011(3) -0.013(3)
F11 0.056(3) 0.040(2) 0.032(2) -0.0089(18) 0.0228(18) -0.0167(19)
Cl12 0.0996(18) 0.0386(11) 0.0599(13) -0.0119(9) 0.0356(12) -0.0313(11)
F13 0.088(4) 0.068(3) 0.036(2) -0.018(2) 0.022(2) -0.022(3)
Cl14 0.0703(14) 0.0770(15) 0.0508(11) -0.0132(11) 0.0398(11) -0.0137(12)
F15 0.065(3) 0.045(2) 0.048(2) -0.015(2) 0.029(2) -0.017(2)
C31 0.021(3) 0.022(3) 0.034(3) -0.003(2) 0.007(2) -0.003(2)
C32 0.031(3) 0.029(3) 0.032(3) -0.003(3) 0.012(3) -0.001(3)
C33 0.031(3) 0.027(3) 0.044(4) 0.007(3) 0.012(3) 0.001(3)
C34 0.031(3) 0.023(3) 0.048(4) -0.010(3) 0.009(3) -0.003(3)
C35 0.031(3) 0.035(3) 0.039(4) -0.005(3) 0.013(3) 0.001(3)
C36 0.029(3) 0.032(3) 0.035(3) 0.002(3) 0.011(3) -0.004(3)
F16 0.045(2) 0.033(2) 0.041(2) 0.0091(17) 0.0175(18) -0.0053(17)
Cl17 0.0652(13) 0.0272(9) 0.0708(13) 0.0156(9) 0.0291(11) -0.0001(8)
F18 0.066(3) 0.037(2) 0.064(3) -0.017(2) 0.023(2) -0.010(2)
Cl19 0.0702(14) 0.0509(11) 0.0523(11) -0.0178(9) 0.0323(10) -0.0057(10)
F20 0.063(3) 0.030(2) 0.049(2) -0.0002(18) 0.033(2) -0.0061(19)
N 0.033(3) 0.052(3) 0.031(3) 0.014(3) 0.013(2) 0.006(3)
C41 0.028(3) 0.047(4) 0.038(4) 0.017(3) 0.011(3) 0.011(3)
C42 0.037(4) 0.049(4) 0.059(5) 0.021(4) 0.019(3) 0.006(3)
C43 0.028(4) 0.059(5) 0.065(5) 0.011(4) 0.020(4) 0.007(3)
C44 0.041(5) 0.055(5) 0.091(7) 0.016(5) 0.030(5) 0.011(4)
C45 0.044(4) 0.058(4) 0.051(4) 0.026(3) 0.023(4) 0.016(3)
C46 0.044(4) 0.049(4) 0.056(5) 0.014(3) 0.022(4) 0.014(3)
C47 0.073(6) 0.056(5) 0.086(6) 0.030(4) 0.049(5) 0.025(4)
C48 0.127(10) 0.043(5) 0.109(8) 0.008(5) 0.082(7) 0.016(5)
C49 0.038(4) 0.053(4) 0.037(4) 0.015(3) 0.016(3) 0.000(3)
C50 0.033(4) 0.074(6) 0.040(4) 0.011(4) 0.015(3) 0.006(4)
C51 0.046(4) 0.058(5) 0.039(4) -0.005(4) 0.022(3) -0.012(4)
C52 0.046(5) 0.149(11) 0.052(5) 0.000(6) 0.026(4) -0.018(6)
C53 0.037(4) 0.075(5) 0.035(3) 0.012(3) 0.014(3) 0.009(4)
C54 0.081(7) 0.067(5) 0.047(4) 0.001(4) 0.019(5) -0.017(5)
C55 0.087(8) 0.116(9) 0.050(5) -0.008(5) -0.004(5) 0.037(7)
C56 0.153(12) 0.087(8) 0.055(6) -0.002(5) 0.024(7) 0.001(8)
 
_geom_special_details
;
 All esds (except the esd in the dihedral angle between two l.s. planes)
 are estimated using the full covariance matrix.  The cell esds are taken
 into account individually in the estimation of esds in distances, angles
 and torsion angles; correlations between esds in cell parameters are only
 used when they are defined by crystal symmetry.  An approximate (isotropic)
 treatment of cell esds is used for estimating esds involving l.s. planes.
;
 
loop_
 _geom_bond_atom_site_label_1
 _geom_bond_atom_site_label_2
 _geom_bond_distance
 _geom_bond_site_symmetry_2
 _geom_bond_publ_flag
Tl Au2 3.0108(2) . ?
Tl Au3 3.0317(3) . ?
Tl Au1 3.0914(2) . ?
Au1 C1 2.046(6) 3_556 ?
Au1 C1 2.046(6) . ?
Au1 Tl 3.0914(2) 3_556 ?
Au2 C11 2.043(6) 3_656 ?
Au2 C11 2.043(6) . ?
Au2 Tl 3.0108(2) 3_656 ?
Au3 C21 2.043(7) . ?
Au3 C31 2.052(6) . ?
C1 C2 1.391(8) . ?
C1 C6 1.396(8) . ?
C2 C3 1.386(8) . ?
C2 Cl1 1.753(6) . ?
C3 C4 1.393(8) . ?
C3 Cl2 1.725(6) . ?
C4 C5 1.381(8) . ?
C4 Cl3 1.719(7) . ?
C5 C6 1.382(8) . ?
C5 Cl4 1.717(6) . ?
C6 Cl5 1.748(6) . ?
C11 C16 1.395(8) . ?
C11 C12 1.405(8) . ?
C12 C13 1.383(8) . ?
C12 Cl6 1.735(6) . ?
C13 C14 1.388(9) . ?
C13 Cl7 1.719(7) . ?
C14 C15 1.390(9) . ?
C14 Cl8 1.706(7) . ?
C15 C16 1.386(9) . ?
C15 Cl9 1.728(7) . ?
C16 Cl10 1.727(7) . ?
C21 C22 1.390(8) . ?
C21 C26 1.393(8) . ?
C22 C23 1.387(9) . ?
C22 F11 1.407(7) . ?
C23 C24 1.377(9) . ?
C23 Cl12 1.712(7) . ?
C24 F13 1.366(8) . ?
C24 C25 1.394(9) . ?
C25 C26 1.384(9) . ?
C25 Cl14 1.730(7) . ?
C26 F15 1.391(7) . ?
C31 C32 1.386(8) . ?
C31 C36 1.387(8) . ?
C32 F16 1.375(7) . ?
C32 C33 1.379(8) . ?
C33 C34 1.377(8) . ?
C33 Cl17 1.729(6) . ?
C34 F18 1.354(7) . ?
C34 C35 1.379(8) . ?
C35 C36 1.374(8) . ?
C35 Cl19 1.732(7) . ?
C36 F20 1.380(7) . ?
N C45 1.518(10) . ?
N C53 1.518(9) . ?
N C41 1.521(8) . ?
N C49 1.526(8) . ?
C41 C42 1.521(9) . ?
C42 C43 1.538(10) . ?
C43 C44 1.507(11) . ?
C45 C46 1.515(11) . ?
C46 C47 1.530(11) . ?
C47 C48 1.520(14) . ?
C49 C50 1.517(10) . ?
C50 C51 1.530(10) . ?
C51 C52 1.517(11) . ?
C53 C54 1.512(12) . ?
C54 C55 1.479(12) . ?
C55 C56 1.445(15) . ?
 
loop_
 _geom_angle_atom_site_label_1
 _geom_angle_atom_site_label_2
 _geom_angle_atom_site_label_3
 _geom_angle
 _geom_angle_site_symmetry_1
 _geom_angle_site_symmetry_3
 _geom_angle_publ_flag
Au2 Tl Au3 75.869(7) . . ?
Au2 Tl Au1 164.436(9) . . ?
Au3 Tl Au1 119.329(9) . . ?
C1 Au1 C1 180.0(2) 3_556 . ?
C1 Au1 Tl 94.96(15) 3_556 . ?
C1 Au1 Tl 85.04(15) . . ?
C1 Au1 Tl 85.04(15) 3_556 3_556 ?
C1 Au1 Tl 94.96(15) . 3_556 ?
Tl Au1 Tl 180.0 . 3_556 ?
C11 Au2 C11 180.00(8) 3_656 . ?
C11 Au2 Tl 92.46(15) 3_656 3_656 ?
C11 Au2 Tl 87.54(15) . 3_656 ?
C11 Au2 Tl 87.54(15) 3_656 . ?
C11 Au2 Tl 92.46(15) . . ?
Tl Au2 Tl 180.0 3_656 . ?
C21 Au3 C31 170.1(2) . . ?
C21 Au3 Tl 92.85(17) . . ?
C31 Au3 Tl 96.89(16) . . ?
C2 C1 C6 113.1(6) . . ?
C2 C1 Au1 125.1(4) . . ?
C6 C1 Au1 121.9(4) . . ?
C3 C2 C1 124.6(5) . . ?
C3 C2 Cl1 117.6(5) . . ?
C1 C2 Cl1 117.7(5) . . ?
C2 C3 C4 118.6(6) . . ?
C2 C3 Cl2 121.6(5) . . ?
C4 C3 Cl2 119.7(5) . . ?
C5 C4 C3 120.0(6) . . ?
C5 C4 Cl3 119.6(5) . . ?
C3 C4 Cl3 120.4(5) . . ?
C4 C5 C6 118.2(6) . . ?
C4 C5 Cl4 120.1(5) . . ?
C6 C5 Cl4 121.7(5) . . ?
C5 C6 C1 125.5(6) . . ?
C5 C6 Cl5 117.5(5) . . ?
C1 C6 Cl5 117.0(5) . . ?
C16 C11 C12 114.1(6) . . ?
C16 C11 Au2 122.4(4) . . ?
C12 C11 Au2 123.6(4) . . ?
C13 C12 C11 124.2(6) . . ?
C13 C12 Cl6 118.5(5) . . ?
C11 C12 Cl6 117.2(5) . . ?
C12 C13 C14 118.9(6) . . ?
C12 C13 Cl7 121.9(6) . . ?
C14 C13 Cl7 119.2(5) . . ?
C13 C14 C15 119.8(6) . . ?
C13 C14 Cl8 120.3(5) . . ?
C15 C14 Cl8 120.0(5) . . ?
C16 C15 C14 119.2(6) . . ?
C16 C15 Cl9 120.9(6) . . ?
C14 C15 Cl9 120.0(5) . . ?
C15 C16 C11 123.9(6) . . ?
C15 C16 Cl10 118.1(5) . . ?
C11 C16 Cl10 118.0(5) . . ?
C22 C21 C26 113.2(6) . . ?
C22 C21 Au3 128.1(5) . . ?
C26 C21 Au3 118.7(4) . . ?
C23 C22 C21 125.6(6) . . ?
C23 C22 F11 115.5(6) . . ?
C21 C22 F11 118.9(6) . . ?
C24 C23 C22 118.0(6) . . ?
C24 C23 Cl12 119.7(5) . . ?
C22 C23 Cl12 122.3(5) . . ?
F13 C24 C23 120.2(6) . . ?
F13 C24 C25 119.8(6) . . ?
C23 C24 C25 120.1(6) . . ?
C26 C25 C24 118.7(6) . . ?
C26 C25 Cl14 121.8(5) . . ?
C24 C25 Cl14 119.5(5) . . ?
C25 C26 F15 116.4(6) . . ?
C25 C26 C21 124.4(6) . . ?
F15 C26 C21 119.2(6) . . ?
C32 C31 C36 113.0(6) . . ?
C32 C31 Au3 117.0(4) . . ?
C36 C31 Au3 130.0(4) . . ?
F16 C32 C33 116.1(5) . . ?
F16 C32 C31 118.5(5) . . ?
C33 C32 C31 125.3(6) . . ?
C34 C33 C32 117.8(6) . . ?
C34 C33 Cl17 120.3(5) . . ?
C32 C33 Cl17 121.9(5) . . ?
F18 C34 C33 119.8(6) . . ?
F18 C34 C35 119.7(6) . . ?
C33 C34 C35 120.5(6) . . ?
C36 C35 C34 118.3(6) . . ?
C36 C35 Cl19 121.9(5) . . ?
C34 C35 Cl19 119.7(5) . . ?
C35 C36 F20 116.5(6) . . ?
C35 C36 C31 125.0(6) . . ?
F20 C36 C31 118.5(5) . . ?
C45 N C53 106.6(5) . . ?
C45 N C41 111.2(6) . . ?
C53 N C41 111.3(6) . . ?
C45 N C49 111.7(6) . . ?
C53 N C49 111.4(6) . . ?
C41 N C49 104.7(5) . . ?
N C41 C42 116.2(5) . . ?
C41 C42 C43 110.2(6) . . ?
C44 C43 C42 112.7(7) . . ?
C46 C45 N 115.5(6) . . ?
C45 C46 C47 109.7(7) . . ?
C48 C47 C46 113.0(8) . . ?
C50 C49 N 117.1(6) . . ?
C49 C50 C51 109.4(6) . . ?
C52 C51 C50 112.0(6) . . ?
C54 C53 N 117.0(6) . . ?
C55 C54 C53 111.9(8) . . ?
C56 C55 C54 120.4(9) . . ?
 
_diffrn_measured_fraction_theta_max    0.995
_diffrn_reflns_theta_full              27.89
_diffrn_measured_fraction_theta_full   0.995
_refine_diff_density_max    1.604
_refine_diff_density_min   -1.671
_refine_diff_density_rms    0.169

 
END of data for 4#########################################
